# Supplementary material for: Spectroscopic Evidence for Clusters of Like‐Charged Ions in Ionic Liquids Stabilized by Cooperative Hydrogen Bonding
Source: PubMed Central journal article supplement — Chemphyschem. 2016 Jan 8;17(4):458–62. doi: 10.1002/cphc.201501134 (PMC4819523; doi:10.1002/cphc.201501134), 2016-01-08
Supplement: CPHC-17-458-s001.pdf [file CPHC-17-458-s001.pdf]

# CHEMPHYSICHEM

## Supporting Information

### **Spectroscopic Evidence for Clusters of Like-Charged Ions in Ionic Liquids Stabilized by Cooperative Hydrogen Bonding**

Anne Knorr,<sup>[a]</sup> Peter Stange,<sup>[a]</sup> Koichi Fumino,<sup>[a]</sup> Frank Weinhold,<sup>\*[b]</sup> and Ralf Ludwig<sup>\*[a, c]</sup>

[cphc\\_201501134\\_sm\\_miscellaneous\\_information.pdf](#)

# Spectroscopic evidence for clusters of like-charged ions in ionic liquids stabilized by cooperative hydrogen bonding\*

Anne Knorr,<sup>a</sup> Peter Stange,<sup>a</sup> Koichi Fumino,<sup>a</sup> Frank Weinhold<sup>b</sup> and Ralf Ludwig<sup>a,c</sup>

<sup>a</sup>Dipl.-Chem. Anne Knorr, M. Sc. Peter Stange, Dr. Koichi Fumino, Prof. Dr. R. Ludwig  
Universität Rostock, Institut für Chemie, Abteilung für Physikalische Chemie  
Dr.-Lorenz-Weg 1, 18059, Rostock (Germany)  
Tel: (+49) 381-498-6517  
E-mail: [ralf.ludwig@uni-rostock.de](mailto:ralf.ludwig@uni-rostock.de)

<sup>b</sup>Prof. F. Weinhold  
Theoretical Chemistry, Institute and Department of Chemistry  
University of Wisconsin  
Madison WI 53706 (USA)  
E-mail: [weinhold@chem.wisc.edu](mailto:weinhold@chem.wisc.edu)

<sup>c</sup>Prof. Dr. R. Ludwig  
Leibniz-Institut für Katalyse  
an der Universität Rostock e.V.  
Albert-Einstein-Str. 29a, 18059 Rostock (Germany)

## Supplementary Information

### Contents

- SI0** Sample preparation
- SI1** Experimental
- SI2** Deconvoluted mid infrared (MIR) spectra of [HEMIm][BF<sub>4</sub>] in 10, 25, 50, 75 and 100 mol% mixtures with [PMIm][BF<sub>4</sub>] at 213 K.
- SI3** Intensities of the deconvoluted mid infrared (MIR) spectra of [HEMIm][BF<sub>4</sub>] in 10, 25, 50, 75 and 100 mol% mixtures with [PMIm][BF<sub>4</sub>] at 213 K.
- SI4** B3LYP/6-31+G\*-D3 optimized geometries of [PMIm][BF<sub>4</sub>] clusters for n=1-6
- SI6** B3LYP/6-31+G\*-D3 optimized geometries of [HEMIm][BF<sub>4</sub>] clusters ca and cc for n=1-4
- SI7** B3LYP/6-31+G\*-D3 optimized geometries of [HEMIm]<sup>+</sup> clusters n=1-4
- SI8** B3LYP/6-31+G\*-D3 optimized geometries of propanol clusters n=1-4

- SI9** DFT-D3 calculated frequencies of the [HEMIm][BF<sub>4</sub>] clusters ca and cc
- SI10** B3LYP/6-31+G\*-D3 calculated total energies and binding energies of [PMIm][BF<sub>4</sub>] and [HEMIm][BF<sub>4</sub>] clusters n=1-6.
- SI11** B3LYP/6-31+G\*-D3 calculated geometries and frequencies of [HEMIm][BF<sub>4</sub>], [HEMIm]<sup>+</sup> and propanol clusters n=1-4.
- SI12** Mid infrared spectra of [HEMIm][BF<sub>4</sub>] at 213 K, 0.5 mol% ethanol and propanol in CCl<sub>4</sub> at 283 K

## **SI0 Sample preparation**

The sample of [HEMim][BF<sub>4</sub>] and [PMIm][BF<sub>4</sub>] were purchased from Iolitec (>99% mass fraction). The ionic liquids were dried under vacuum for around 48 hours in order to reduce the water content under 100 ppm and remove other volatile impurities as well. The water content was checked using a Karl Fischer titrator (Titroline KF Trace, Schott Instruments GmbH) resulting in 64 ppm and 85 ppm.

## **SI1 Experimental**

Mid infrared (MIR) measurements were performed with a Bruker Vector 22 FTIR spectrometer. An L.O.T.-Oriel variable-temperature cell equipped with CaF<sub>2</sub> windows having a path length of 12 μm was used for the variable-temperature experiments between 213 and 353 K. Cooling of the cell is achieved by means of a cooling dewar with liquid ethanol/nitrogen mixture. For each spectrum 128 scans were recorded at a spectral resolution of 1 cm<sup>-1</sup>.

The spectra were deconvoluted separately into a number of Voigt-profiles (convolution of Lorentzian and Gaussian functions) following the Levenberg-Marquardt procedure. The Voigt-profile has four parameters: the intensity, the frequency, the half-width of the Lorentzian, and the half-width of the Gaussian.

**SI2 Deconvoluted mid infrared (MIR) spectra of [HEMIm][BF<sub>4</sub>] in 10, 25, 50, 75 and 100 mol% mixtures with [PMIm][BF<sub>4</sub>] at 213 K.**

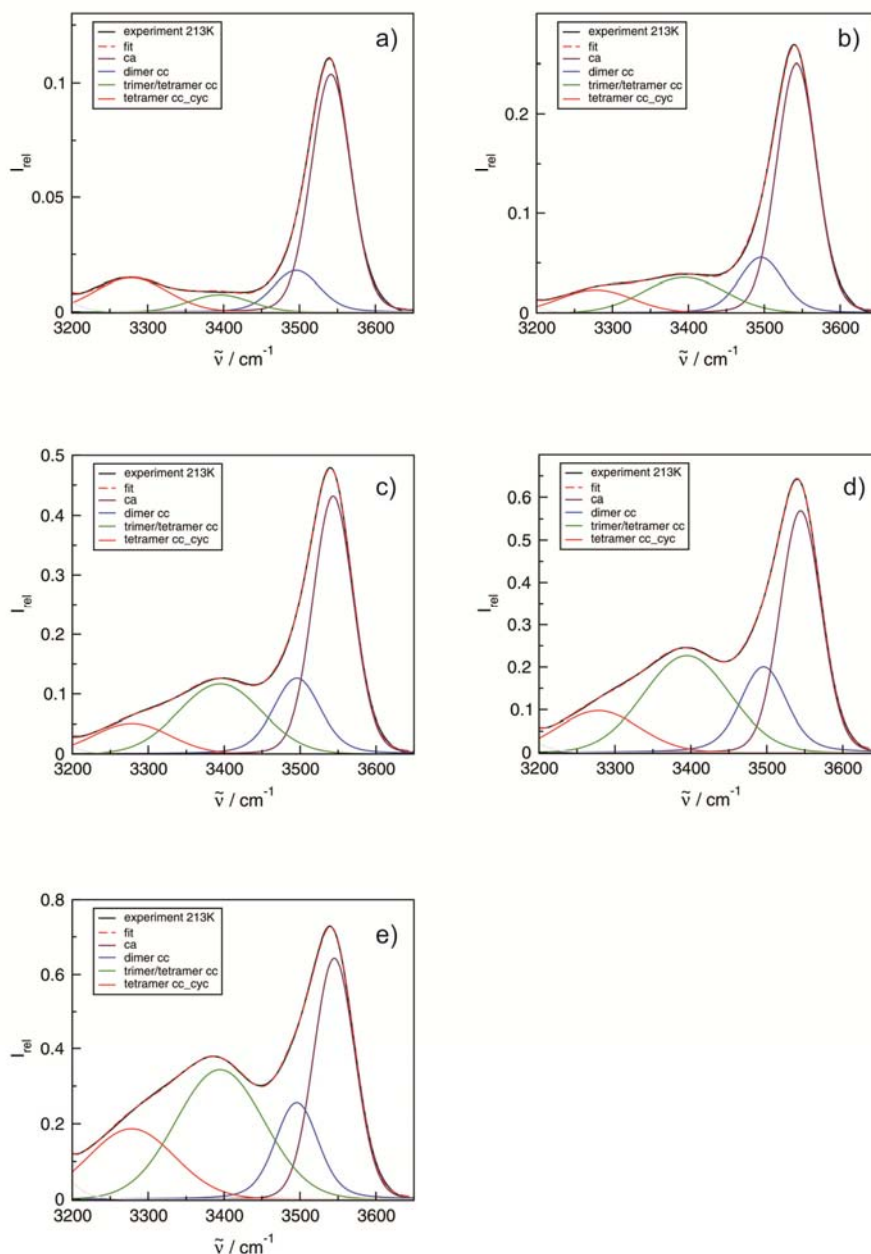

**SI-FIG1** Deconvoluted mid infrared (MIR) spectra of [HEMIm][BF<sub>4</sub>] in a) 10, b) 25, c) 50, d) 75 and e) 100 mol% mixtures with [PMIm][BF<sub>4</sub>] at 213 K.

All spectra were deconvoluted separately into a number of Voigt profiles (convolution of Lorentzian and Gaussian functions) following the Levenberg-Marquardt procedure. The Voigt profile has four parameters: the intensity, the frequency, the half-width of the Lorentzian, and the half-width of the Gaussian.

**SI3 Intensities of the deconvoluted mid infrared (MIR) spectra of [HEMIm][BF<sub>4</sub>] in 10, 25, 50, 75 and 100 mol% mixtures with [PMIm][BF<sub>4</sub>] at 213 K.**

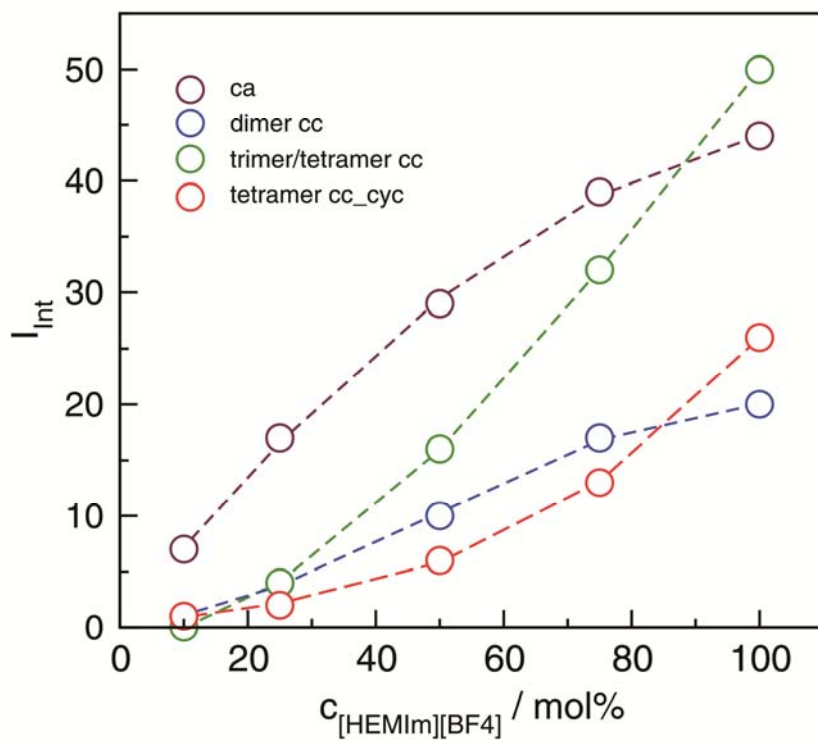

**SI-FIG2** Intensities of the deconvoluted mid infrared (MIR) spectra of [HEMIm][BF<sub>4</sub>] in 10, 25, 50, 75 and 100 mol% mixtures with [PMIm][BF<sub>4</sub>] at 213 K.

## SI4 DFT-D3 optimized geometries of [HEMIm][BF<sub>4</sub>] clusters ca and cc

The IL clusters have been calculated at the DFT level B3LYP, using the internal stored 6-31+G\* basis set of the Gaussian 09 program.[24] Grimme's DFT-D3 method was applied for calculating dispersion forces.[SI1-3]

### Literature

- [SI1] Gaussian 03, Revision C.02, M. J. Frisch, G. W. Trucks, H. B. Schlegel, G. E. Scuseria, M. A. Robb, J. R. Cheeseman, J. A. Montgomery, Jr., T. Vreven, K. N. Kudin, J. C. Burant, J. M. Millam, S. S. Iyengar, J. Tomasi, V. Barone, B. Mennucci, M. Cossi, G. Scalmani, N. Rega, G. A. Petersson, H. Nakatsuji, M. Hada, M. Ehara, K. Toyota, R. Fukuda, J. Hasegawa, M. Ishida, T. Nakajima, Y. Honda, O. Kitao, H. Nakai, M. Klene, X. Li, J. E. Knox, H. P. Hratchian, J. B. Cross, V. Bakken, C. Adamo, J. Jaramillo, R. Gomperts, R. E. Stratmann, O. Yazyev, A. J. Austin, R. Cammi, C. Pomelli, J. W. Ochterski, P. Y. Ayala, K. Morokuma, G. A. Voth, P. Salvador, J. J. Dannenberg, V. G. Zakrzewski, S. Dapprich, A. D. Daniels, M. C. Strain, O. Farkas, D. K. Malick, A. D. Rabuck, K. Raghavachari, J. B. Foresman, J. V. Ortiz, Q. Cui, A. G. Baboul, S. Clifford, J. Cioslowski, B. B. Stefanov, G. Liu, A. Liashenko, P. Piskorz, I. Komaromi, R. L. Martin, D. J. Fox, T. Keith, M. A. Al-Laham, C. Y. Peng, A. Nanayakkara, M. Challacombe, P. M. W. Gill, B. Johnson, W. Chen, M. W. Wong, C. Gonzalez, and J. A. Pople, Gaussian, Inc., Wallingford CT, 2004.
- [SI2] S. Grimme, J. Antony, S. Ehrlich, H. Krieg, *J. Chem. Phys.* **2010**, 132, 154104.
- [SI3] S. Ehrlich, J. Moellmann, W. Reckien, T. Bredow, S. Grimme, *ChemPhysChem.* **2011**, 12, 3414-3420.

**[PMIm][BF<sub>4</sub>]**

monomer

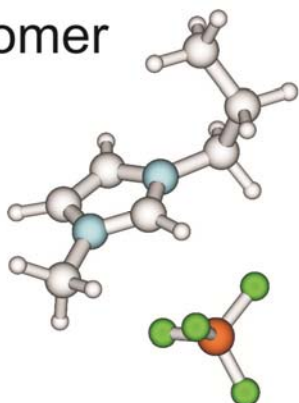

dimer

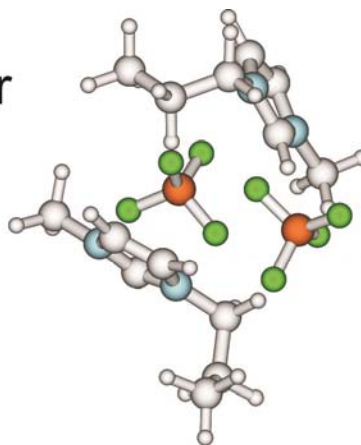

trimer

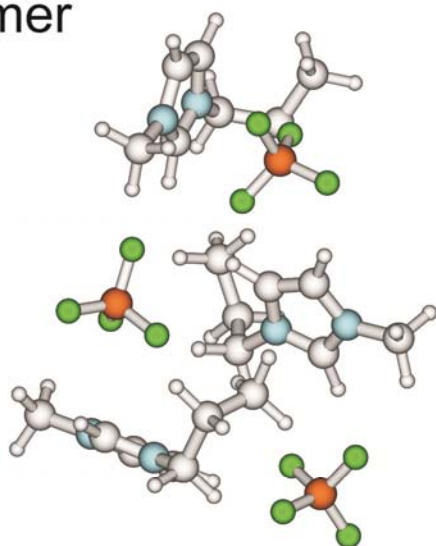

tetramer

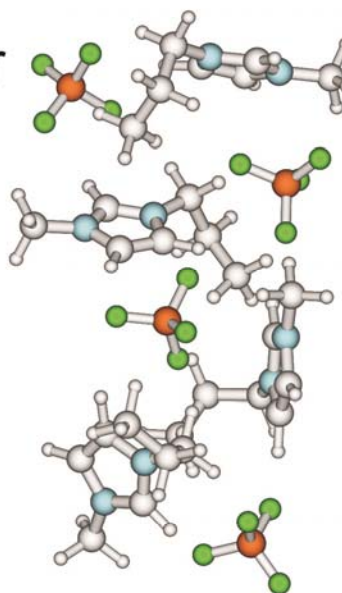

pentamer

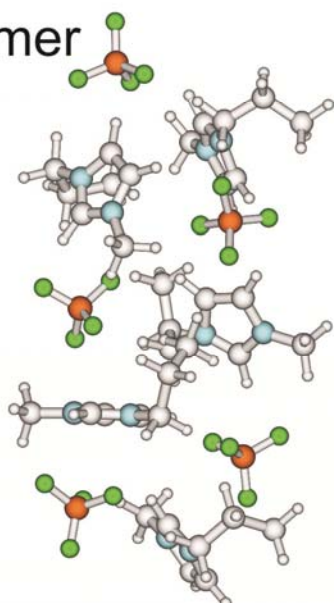

hexamer

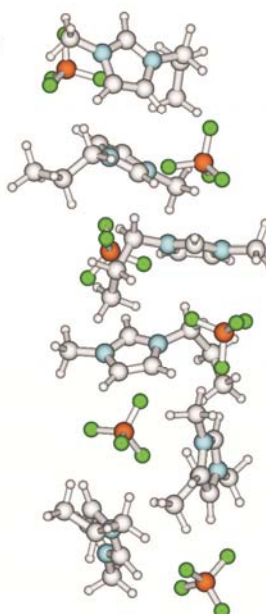



## Monomer

\*\*\* imCH3\_BF4\_b3lyp\_6-31+Gp\_D3.g09, E(RB3LYP) = -808.592825032, 9.11.2015

|   |   |           |           |           |
|---|---|-----------|-----------|-----------|
| 7 | 0 | 0.118402  | 1.788019  | 0.322548  |
| 6 | 0 | 0.412238  | 0.491213  | 0.449592  |
| 7 | 0 | 1.331459  | 0.165168  | -0.464738 |
| 6 | 0 | 1.632197  | 1.293125  | -1.206486 |
| 6 | 0 | 0.866757  | 2.310614  | -0.715946 |
| 6 | 0 | 1.838245  | -1.204812 | -0.685360 |
| 6 | 0 | 2.681809  | -1.705304 | 0.490237  |
| 6 | 0 | 3.928380  | -0.855584 | 0.756445  |
| 6 | 0 | -0.990318 | 2.463559  | 1.005189  |
| 9 | 0 | -2.223529 | -0.378719 | 1.277736  |
| 5 | 0 | -2.300249 | -0.827511 | -0.082704 |
| 9 | 0 | -1.226814 | -1.752822 | -0.278321 |
| 9 | 0 | -2.059342 | 0.301493  | -0.916965 |
| 9 | 0 | -3.522328 | -1.407948 | -0.350650 |
| 1 | 0 | -0.649859 | 3.436699  | 1.366178  |
| 1 | 0 | -1.816757 | 2.564257  | 0.298958  |
| 1 | 0 | -1.325269 | 1.836631  | 1.830182  |
| 1 | 0 | 0.962538  | -1.836455 | -0.853437 |
| 1 | 0 | 2.431698  | -1.166391 | -1.603519 |
| 1 | 0 | -0.083258 | -0.191182 | 1.122063  |
| 1 | 0 | 2.351163  | 1.270105  | -2.010254 |
| 1 | 0 | 0.781123  | 3.343105  | -1.016677 |
| 1 | 0 | 2.967239  | -2.739712 | 0.261455  |
| 1 | 0 | 2.051499  | -1.754457 | 1.387561  |
| 1 | 0 | 4.508059  | -1.262681 | 1.591753  |
| 1 | 0 | 4.583842  | -0.827539 | -0.123685 |
| 1 | 0 | 3.662459  | 0.177965  | 1.010042  |

## Dimer

\*\*\* imCH3\_BF4\_b3lyp\_6-31+Gp\_dimer\_D3.g09, E(RB3LYP) = -1617.23646365, 9.11.2015

|   |   |           |           |           |
|---|---|-----------|-----------|-----------|
| 7 | 0 | -0.731982 | 2.432604  | 1.569132  |
| 6 | 0 | -1.060902 | 2.381093  | 0.274228  |
| 7 | 0 | -1.859717 | 1.328394  | 0.073400  |
| 6 | 0 | -2.051625 | 0.677864  | 1.280316  |
| 6 | 0 | -1.343046 | 1.370675  | 2.217586  |
| 6 | 0 | -2.410112 | 0.929013  | -1.239507 |
| 6 | 0 | -3.788987 | 1.540505  | -1.508347 |
| 6 | 0 | -4.869858 | 1.094035  | -0.517032 |
| 6 | 0 | 0.263326  | 3.333193  | 2.151765  |
| 6 | 0 | 2.513319  | -0.119699 | 2.959883  |
| 6 | 0 | 1.389938  | -1.108844 | 2.635949  |
| 6 | 0 | 1.821467  | -2.296470 | 1.770216  |
| 7 | 0 | 2.254414  | -1.885317 | 0.421439  |
| 6 | 0 | 3.535156  | -1.516689 | 0.045570  |
| 6 | 0 | 3.477915  | -1.143548 | -1.263849 |
| 7 | 0 | 2.164584  | -1.292973 | -1.665567 |
| 6 | 0 | 1.440575  | -1.729468 | -0.629860 |
| 6 | 0 | 1.636692  | -1.007638 | -3.002379 |
| 9 | 0 | 1.636240  | 3.340612  | -0.678090 |
| 5 | 0 | 1.765482  | 1.984848  | -1.051451 |
| 9 | 0 | 0.686674  | 1.646421  | -1.919231 |
| 9 | 0 | 1.659116  | 1.179184  | 0.117651  |
| 9 | 0 | 2.981486  | 1.739390  | -1.697032 |
| 9 | 0 | -1.487387 | -2.220506 | -1.250721 |
| 5 | 0 | -2.078595 | -2.656652 | -0.016658 |

|   |   |           |           |           |
|---|---|-----------|-----------|-----------|
| 9 | 0 | -2.294089 | -4.020981 | -0.035425 |
| 9 | 0 | -1.159983 | -2.303495 | 1.022619  |
| 9 | 0 | -3.275958 | -1.930339 | 0.181751  |
| 1 | 0 | 0.987509  | -2.987564 | 1.641066  |
| 1 | 0 | 2.663601  | -2.834154 | 2.218345  |
| 1 | 0 | 1.863713  | 0.028233  | -3.253937 |
| 1 | 0 | 2.087015  | -1.696855 | -3.721743 |
| 1 | 0 | 0.555538  | -1.147549 | -2.980498 |
| 1 | 0 | 0.376530  | -1.925327 | -0.648347 |
| 1 | 0 | 4.230995  | -0.743878 | -1.923093 |
| 1 | 0 | 4.357980  | -1.534370 | 0.742125  |
| 1 | 0 | -0.165124 | 3.835271  | 3.022784  |
| 1 | 0 | 1.142602  | 2.749941  | 2.434124  |
| 1 | 0 | 0.564819  | 4.058621  | 1.397379  |
| 1 | 0 | -1.672979 | 1.242067  | -1.982199 |
| 1 | 0 | -2.453630 | -0.160177 | -1.238819 |
| 1 | 0 | -0.676799 | 3.035505  | -0.490898 |
| 1 | 0 | -2.631197 | -0.230395 | 1.340178  |
| 1 | 0 | -1.203295 | 1.192473  | 3.272164  |
| 1 | 0 | 0.975544  | -1.534279 | 3.559823  |
| 1 | 0 | 0.566532  | -0.601187 | 2.124736  |
| 1 | 0 | -4.068914 | 1.234408  | -2.524836 |
| 1 | 0 | -3.708008 | 2.636657  | -1.522838 |
| 1 | 0 | -5.850450 | 1.482915  | -0.813718 |
| 1 | 0 | -4.928524 | 0.001055  | -0.468752 |
| 1 | 0 | -4.663021 | 1.462540  | 0.495085  |
| 1 | 0 | 2.156472  | 0.653232  | 3.651832  |
| 1 | 0 | 3.362800  | -0.620614 | 3.443926  |
| 1 | 0 | 2.866715  | 0.386775  | 2.056872  |

### Trimer

\*\*\* imCH3\_BF4\_b3lyp\_6-31+Gp\_trimer\_D3.g09, E(RB3LYP) = -2425.85790823,  
9.11.2015

|   |   |           |           |           |
|---|---|-----------|-----------|-----------|
| 6 | 0 | 5.630807  | -2.200121 | -1.999415 |
| 6 | 0 | 4.418557  | -1.346974 | -2.382991 |
| 6 | 0 | 4.678192  | 0.164777  | -2.361402 |
| 7 | 0 | 4.908756  | 0.704187  | -1.010885 |
| 6 | 0 | 6.088611  | 0.654961  | -0.287510 |
| 6 | 0 | 5.825844  | 1.188394  | 0.939188  |
| 7 | 0 | 4.495608  | 1.559839  | 0.943937  |
| 6 | 0 | 3.959380  | 1.243777  | -0.236036 |
| 6 | 0 | 3.767518  | 2.144635  | 2.076334  |
| 9 | 0 | 4.120523  | -1.638868 | 0.685149  |
| 5 | 0 | 3.471820  | -1.385292 | 1.920689  |
| 9 | 0 | 2.899717  | -2.569164 | 2.415429  |
| 9 | 0 | 4.394511  | -0.841254 | 2.834603  |
| 9 | 0 | 2.436910  | -0.433362 | 1.680498  |
| 6 | 0 | 0.274557  | -1.116730 | -0.221033 |
| 7 | 0 | -0.806269 | -1.287652 | -1.074381 |
| 6 | 0 | -1.373065 | -2.473294 | -0.818360 |
| 7 | 0 | -0.683737 | -3.068515 | 0.162652  |
| 6 | 0 | 0.358356  | -2.239477 | 0.547830  |
| 6 | 0 | -1.302076 | -0.326742 | -2.075548 |
| 6 | 0 | -0.477651 | -0.324932 | -3.368448 |
| 6 | 0 | 0.972371  | 0.141546  | -3.189195 |
| 6 | 0 | -1.017813 | -4.362185 | 0.761857  |
| 9 | 0 | -0.535813 | 2.872915  | -1.520488 |
| 5 | 0 | -0.149834 | 2.724735  | -0.162884 |
| 9 | 0 | 1.212373  | 2.329725  | -0.120338 |
| 9 | 0 | -0.335943 | 3.932839  | 0.526571  |
| 9 | 0 | -0.941137 | 1.714501  | 0.427288  |

|   |   |           |           |           |
|---|---|-----------|-----------|-----------|
| 6 | 0 | -2.401813 | -0.701108 | 2.043957  |
| 6 | 0 | -2.975557 | 0.437666  | 2.887818  |
| 6 | 0 | -4.249161 | 1.050309  | 2.294441  |
| 7 | 0 | -4.000956 | 1.782466  | 1.031758  |
| 6 | 0 | -4.226743 | 1.304200  | -0.246232 |
| 6 | 0 | -3.851450 | 2.293674  | -1.108191 |
| 7 | 0 | -3.402013 | 3.356989  | -0.346797 |
| 6 | 0 | -3.487822 | 3.015506  | 0.942425  |
| 6 | 0 | -2.932509 | 4.643118  | -0.867213 |
| 9 | 0 | -5.376154 | -1.461152 | 0.588804  |
| 5 | 0 | -4.924903 | -2.405746 | -0.371421 |
| 9 | 0 | -4.220880 | -1.673744 | -1.392757 |
| 9 | 0 | -5.981713 | -3.103587 | -0.926192 |
| 9 | 0 | -3.993674 | -3.285499 | 0.242584  |
| 1 | 0 | -4.706407 | 1.764501  | 2.986767  |
| 1 | 0 | -4.979736 | 0.274647  | 2.057340  |
| 1 | 0 | -2.220375 | 4.451195  | -1.669238 |
| 1 | 0 | -3.787203 | 5.223499  | -1.225808 |
| 1 | 0 | -2.409438 | 5.173239  | -0.072334 |
| 1 | 0 | -3.159532 | 3.624177  | 1.769884  |
| 1 | 0 | -3.851611 | 2.329933  | -2.185908 |
| 1 | 0 | -4.611655 | 0.309970  | -0.417681 |
| 1 | 0 | -0.375876 | -5.143128 | 0.345015  |
| 1 | 0 | -0.858819 | -4.296584 | 1.839855  |
| 1 | 0 | -2.068890 | -4.576212 | 0.564720  |
| 1 | 0 | -2.341046 | -0.600664 | -2.270101 |
| 1 | 0 | -1.285848 | 0.655833  | -1.605644 |
| 1 | 0 | -2.284149 | -2.839757 | -1.262729 |
| 1 | 0 | 0.838168  | -0.200656 | -0.176610 |
| 1 | 0 | 1.051861  | -2.500619 | 1.333782  |
| 1 | 0 | -3.243416 | 0.071927  | 3.888103  |
| 1 | 0 | -2.221699 | 1.223897  | 3.025193  |
| 1 | 0 | -0.994510 | 0.351301  | -4.061829 |
| 1 | 0 | -0.506276 | -1.324503 | -3.822819 |
| 1 | 0 | 3.822402  | 0.709030  | -2.770337 |
| 1 | 0 | 5.556460  | 0.422732  | -2.963237 |
| 1 | 0 | 3.779885  | 1.425686  | 2.895649  |
| 1 | 0 | 4.252347  | 3.082289  | 2.360587  |
| 1 | 0 | 2.740156  | 2.328645  | 1.764151  |
| 1 | 0 | 2.926968  | 1.407993  | -0.503866 |
| 1 | 0 | 6.447743  | 1.300441  | 1.812710  |
| 1 | 0 | 6.990075  | 0.230335  | -0.698385 |
| 1 | 0 | 4.093692  | -1.586912 | -3.404684 |
| 1 | 0 | 3.586856  | -1.573899 | -1.708451 |
| 1 | 0 | 5.885151  | -2.064238 | -0.944905 |
| 1 | 0 | 6.504649  | -1.958924 | -2.620782 |
| 1 | 0 | 5.405696  | -3.262851 | -2.139200 |
| 1 | 0 | 1.543864  | -0.565017 | -2.577689 |
| 1 | 0 | 1.474667  | 0.217367  | -4.161184 |
| 1 | 0 | 1.002378  | 1.124498  | -2.704850 |
| 1 | 0 | -1.494001 | -1.096057 | 2.510967  |
| 1 | 0 | -3.124696 | -1.513079 | 1.920211  |
| 1 | 0 | -2.122617 | -0.335847 | 1.053410  |

## Tetramer

\*\*\* imOH\_BF4\_b3lyp\_6-31+Gp\_tetramer\_D3.g09, E(RB3LYP) = -3234.49318694,  
9.11.2015

|   |   |           |          |           |
|---|---|-----------|----------|-----------|
| 7 | 0 | -5.932373 | 2.683775 | -0.638086 |
| 6 | 0 | -6.235432 | 1.603181 | 0.090480  |
| 7 | 0 | -5.348829 | 1.496179 | 1.086624  |
| 6 | 0 | -4.441383 | 2.537943 | 0.992300  |

|   |   |           |           |           |
|---|---|-----------|-----------|-----------|
| 6 | 0 | -4.812573 | 3.286499  | -0.085595 |
| 6 | 0 | -5.341464 | 0.401775  | 2.079804  |
| 6 | 0 | -5.945333 | 0.813857  | 3.426508  |
| 6 | 0 | -5.156089 | 1.901074  | 4.165369  |
| 6 | 0 | -6.633878 | 3.105544  | -1.852842 |
| 6 | 0 | -3.711208 | 0.525424  | -2.050323 |
| 6 | 0 | -2.462908 | -0.284580 | -2.403407 |
| 6 | 0 | -2.623147 | -1.795817 | -2.187179 |
| 7 | 0 | -2.674998 | -2.165503 | -0.759269 |
| 6 | 0 | -3.814404 | -2.330708 | 0.008697  |
| 6 | 0 | -3.392876 | -2.613086 | 1.275405  |
| 7 | 0 | -2.009455 | -2.616163 | 1.260938  |
| 6 | 0 | -1.599514 | -2.332674 | 0.021972  |
| 6 | 0 | -1.135984 | -2.842674 | 2.417752  |
| 9 | 0 | -5.892899 | -1.904880 | -2.349023 |
| 5 | 0 | -7.048416 | -1.334545 | -1.763385 |
| 9 | 0 | -6.835820 | -1.287034 | -0.338718 |
| 9 | 0 | -8.184005 | -2.063365 | -2.055255 |
| 9 | 0 | -7.178034 | 0.014722  | -2.209440 |
| 9 | 0 | -2.338536 | 0.422607  | 0.814641  |
| 5 | 0 | -1.561592 | 0.665895  | 1.976091  |
| 9 | 0 | -1.395428 | 2.066199  | 2.117741  |
| 9 | 0 | -2.245547 | 0.149521  | 3.100060  |
| 9 | 0 | -0.314420 | 0.036448  | 1.836164  |
| 6 | 0 | 1.505124  | 0.703186  | -0.469435 |
| 7 | 0 | 2.526828  | 0.932077  | -1.380112 |
| 6 | 0 | 2.821224  | 2.237695  | -1.377044 |
| 7 | 0 | 2.013695  | 2.852807  | -0.504228 |
| 6 | 0 | 1.176232  | 1.910564  | 0.072127  |
| 6 | 0 | 3.240960  | -0.075917 | -2.187006 |
| 6 | 0 | 2.459306  | -0.526820 | -3.426078 |
| 6 | 0 | 1.159245  | -1.277566 | -3.114874 |
| 6 | 0 | 2.061903  | 4.277920  | -0.172334 |
| 9 | 0 | 3.239642  | -3.155907 | -0.995343 |
| 5 | 0 | 2.763443  | -2.833483 | 0.300580  |
| 9 | 0 | 1.348763  | -2.745141 | 0.253364  |
| 9 | 0 | 3.171224  | -3.809314 | 1.223237  |
| 9 | 0 | 3.287951  | -1.575943 | 0.679014  |
| 6 | 0 | 4.186932  | 1.350738  | 1.741590  |
| 6 | 0 | 4.958608  | 0.528254  | 2.773756  |
| 6 | 0 | 6.349160  | 0.101545  | 2.289504  |
| 7 | 0 | 6.295543  | -0.885738 | 1.187880  |
| 6 | 0 | 6.453274  | -0.614719 | -0.159368 |
| 6 | 0 | 6.316681  | -1.802742 | -0.817539 |
| 7 | 0 | 6.075084  | -2.777125 | 0.133407  |
| 6 | 0 | 6.051369  | -2.193633 | 1.335433  |
| 6 | 0 | 5.906958  | -4.209188 | -0.126925 |
| 9 | 0 | 6.894199  | 2.455459  | 0.096976  |
| 5 | 0 | 6.283960  | 3.059651  | -1.034096 |
| 9 | 0 | 5.771234  | 1.999598  | -1.862882 |
| 9 | 0 | 7.186961  | 3.828061  | -1.744326 |
| 9 | 0 | 5.174428  | 3.838276  | -0.603766 |
| 1 | 0 | 6.926979  | -0.359505 | 3.096944  |
| 1 | 0 | 6.907224  | 0.957243  | 1.904167  |
| 1 | 0 | 5.285167  | -4.327148 | -1.013415 |
| 1 | 0 | 6.887534  | -4.672286 | -0.268259 |
| 1 | 0 | 5.378542  | -4.657610 | 0.713599  |
| 1 | 0 | 5.831242  | -2.694339 | 2.264862  |
| 1 | 0 | 6.355167  | -2.036315 | -1.869568 |
| 1 | 0 | 6.623140  | 0.389950  | -0.516872 |
| 1 | 0 | 1.278438  | 4.815087  | -0.714412 |
| 1 | 0 | 1.906012  | 4.389080  | 0.902508  |
| 1 | 0 | 3.048081  | 4.662425  | -0.434131 |
| 1 | 0 | 4.192449  | 0.381855  | -2.465294 |

|   |   |           |           |           |
|---|---|-----------|-----------|-----------|
| 1 | 0 | 3.443830  | -0.919026 | -1.528607 |
| 1 | 0 | 3.635376  | 2.695979  | -1.914965 |
| 1 | 0 | 1.160326  | -0.287240 | -0.225340 |
| 1 | 0 | 0.452589  | 2.165784  | 0.830955  |
| 1 | 0 | 5.113577  | 1.114862  | 3.689126  |
| 1 | 0 | 4.381561  | -0.361800 | 3.055879  |
| 1 | 0 | 3.133734  | -1.185403 | -3.988787 |
| 1 | 0 | 2.259405  | 0.341052  | -4.069226 |
| 1 | 0 | -1.779046 | -2.340616 | -2.620832 |
| 1 | 0 | -3.547921 | -2.159867 | -2.639781 |
| 1 | 0 | -1.307600 | -2.047050 | 3.143888  |
| 1 | 0 | -1.364499 | -3.821821 | 2.846805  |
| 1 | 0 | -0.100879 | -2.813004 | 2.080002  |
| 1 | 0 | -0.566522 | -2.265392 | -0.281417 |
| 1 | 0 | -3.949313 | -2.803133 | 2.179440  |
| 1 | 0 | -4.803428 | -2.223422 | -0.410458 |
| 1 | 0 | -7.242084 | 3.989844  | -1.643426 |
| 1 | 0 | -5.894376 | 3.336502  | -2.622908 |
| 1 | 0 | -7.256688 | 2.279909  | -2.197655 |
| 1 | 0 | -5.903344 | -0.416580 | 1.625204  |
| 1 | 0 | -4.302422 | 0.093542  | 2.192384  |
| 1 | 0 | -7.010315 | 0.888229  | -0.137260 |
| 1 | 0 | -3.589468 | 2.617112  | 1.649754  |
| 1 | 0 | -4.368845 | 4.168301  | -0.520528 |
| 1 | 0 | -2.207524 | -0.145193 | -3.462545 |
| 1 | 0 | -1.609544 | 0.072688  | -1.814171 |
| 1 | 0 | -5.973452 | -0.097622 | 4.038150  |
| 1 | 0 | -6.989329 | 1.123122  | 3.280309  |
| 1 | 0 | -5.569495 | 2.062635  | 5.167255  |
| 1 | 0 | -4.102719 | 1.616247  | 4.267994  |
| 1 | 0 | -5.199424 | 2.861094  | 3.637674  |
| 1 | 0 | -3.945463 | 0.414882  | -0.989768 |
| 1 | 0 | -4.580615 | 0.202177  | -2.629201 |
| 1 | 0 | -3.531749 | 1.590788  | -2.237800 |
| 1 | 0 | 0.425500  | -0.620943 | -2.636223 |
| 1 | 0 | 0.704296  | -1.657946 | -4.037001 |
| 1 | 0 | 1.353036  | -2.125471 | -2.448434 |
| 1 | 0 | 3.201267  | 1.618860  | 2.134977  |
| 1 | 0 | 4.728301  | 2.261537  | 1.469118  |
| 1 | 0 | 4.025726  | 0.763989  | 0.834777  |

## Pentamer

\*\*\* imCH3\_BF4\_b3lyp\_6-31+Gp\_pentamer\_D3.g09, E(RB3LYP) = -4043.13951749,  
9.11.2015

|   |   |           |           |           |
|---|---|-----------|-----------|-----------|
| 6 | 0 | -3.405671 | 2.495486  | 1.185223  |
| 7 | 0 | -3.455498 | 1.164525  | 1.079323  |
| 6 | 0 | -3.292135 | 0.822026  | -0.251960 |
| 6 | 0 | -3.146511 | 1.986967  | -0.942643 |
| 7 | 0 | -3.217366 | 3.015840  | -0.027391 |
| 6 | 0 | -3.635565 | 0.227120  | 2.199350  |
| 6 | 0 | -2.314797 | -0.090910 | 2.907973  |
| 6 | 0 | -1.268720 | -0.707203 | 1.976560  |
| 6 | 0 | -3.169283 | 4.439984  | -0.346362 |
| 9 | 0 | -5.827625 | 4.022460  | 1.580019  |
| 5 | 0 | -6.567652 | 2.959725  | 1.034811  |
| 9 | 0 | -6.121260 | 2.728576  | -0.306974 |
| 9 | 0 | -7.934162 | 3.193059  | 1.050289  |
| 9 | 0 | -6.275706 | 1.763440  | 1.783550  |
| 9 | 0 | -0.375837 | 2.388869  | 0.667385  |
| 5 | 0 | 0.363687  | 2.783527  | -0.471521 |
| 9 | 0 | 1.031421  | 3.995454  | -0.199657 |

|   |   |           |           |           |
|---|---|-----------|-----------|-----------|
| 9 | 0 | -0.490769 | 2.941435  | -1.580005 |
| 9 | 0 | 1.320731  | 1.771287  | -0.759232 |
| 6 | 0 | -6.949158 | -0.093837 | -0.473813 |
| 7 | 0 | -7.172426 | -0.097645 | -1.789974 |
| 6 | 0 | -8.277417 | -0.884782 | -2.050350 |
| 6 | 0 | -8.729543 | -1.345475 | -0.849020 |
| 7 | 0 | -7.888360 | -0.834148 | 0.122704  |
| 6 | 0 | -6.320943 | 0.568634  | -2.777516 |
| 6 | 0 | -7.965834 | -1.071087 | 1.577110  |
| 6 | 0 | -7.047649 | -2.213093 | 2.027635  |
| 6 | 0 | -7.360975 | -3.560349 | 1.370078  |
| 9 | 0 | -5.863460 | -2.747685 | -1.718707 |
| 5 | 0 | -4.517702 | -2.598178 | -1.389341 |
| 9 | 0 | -3.809924 | -3.808442 | -1.537638 |
| 9 | 0 | -4.386959 | -2.136152 | -0.052917 |
| 9 | 0 | -3.914588 | -1.617962 | -2.247634 |
| 6 | 0 | -1.038542 | -2.506969 | -1.495434 |
| 7 | 0 | -0.362340 | -1.353812 | -1.573462 |
| 6 | 0 | 0.696382  | -1.393255 | -0.676772 |
| 6 | 0 | 0.645092  | -2.609146 | -0.058571 |
| 7 | 0 | -0.446780 | -3.283629 | -0.579058 |
| 6 | 0 | -0.717112 | -0.242141 | -2.476863 |
| 6 | 0 | 0.102365  | -0.238466 | -3.772723 |
| 6 | 0 | 1.603503  | -0.010559 | -3.564254 |
| 6 | 0 | -0.918584 | -4.605520 | -0.156080 |
| 9 | 0 | 1.581297  | -2.096246 | 3.228306  |
| 5 | 0 | 2.818126  | -2.151760 | 2.576606  |
| 9 | 0 | 3.868820  | -1.865603 | 3.466135  |
| 9 | 0 | 2.835072  | -1.192304 | 1.518991  |
| 9 | 0 | 3.006630  | -3.431069 | 1.985931  |
| 6 | 0 | 3.251390  | 2.724823  | 1.415096  |
| 7 | 0 | 4.501586  | 2.752219  | 0.940768  |
| 6 | 0 | 5.243181  | 1.770104  | 1.579475  |
| 6 | 0 | 4.401669  | 1.149503  | 2.459096  |
| 7 | 0 | 3.164123  | 1.759686  | 2.336698  |
| 6 | 0 | 4.948731  | 3.594229  | -0.188611 |
| 6 | 0 | 4.342696  | 3.120883  | -1.516297 |
| 6 | 0 | 4.684912  | 1.664453  | -1.844787 |
| 6 | 0 | 1.943803  | 1.416182  | 3.074169  |
| 6 | 0 | 4.691917  | -2.378350 | -0.604194 |
| 7 | 0 | 5.893544  | -1.913119 | -0.098621 |
| 6 | 0 | 6.607315  | -1.381980 | -1.096614 |
| 7 | 0 | 5.901651  | -1.485983 | -2.229381 |
| 6 | 0 | 4.697256  | -2.110847 | -1.942258 |
| 6 | 0 | 6.332714  | -0.984206 | -3.536234 |
| 6 | 0 | 6.346915  | -1.992884 | 1.307143  |
| 6 | 0 | 7.104764  | -3.291383 | 1.604645  |
| 6 | 0 | 6.272594  | -4.561483 | 1.396863  |
| 9 | 0 | 8.128165  | 1.048411  | -1.785982 |
| 5 | 0 | 8.583025  | 1.540429  | -0.517100 |
| 9 | 0 | 9.963021  | 1.561590  | -0.474316 |
| 9 | 0 | 8.019333  | 2.807647  | -0.286948 |
| 9 | 0 | 8.067689  | 0.636064  | 0.480920  |
| 1 | 0 | -5.523784 | -0.115156 | -3.078306 |
| 1 | 0 | -6.935777 | 0.846939  | -3.635592 |
| 1 | 0 | -5.908621 | 1.467117  | -2.316423 |
| 1 | 0 | -7.703333 | -0.127412 | 2.061760  |
| 1 | 0 | -9.013937 | -1.295073 | 1.798491  |
| 1 | 0 | -6.178506 | 0.461606  | 0.031989  |
| 1 | 0 | -9.560486 | -1.986055 | -0.600636 |
| 1 | 0 | -8.630125 | -1.055878 | -3.054941 |
| 1 | 0 | -7.146123 | -2.283436 | 3.119170  |
| 1 | 0 | -6.009428 | -1.939122 | 1.812834  |
| 1 | 0 | -6.718580 | -4.345744 | 1.782635  |

|   |   |           |           |           |
|---|---|-----------|-----------|-----------|
| 1 | 0 | -8.404701 | -3.857173 | 1.542888  |
| 1 | 0 | -7.177431 | -3.524507 | 0.291474  |
| 1 | 0 | -4.374917 | 0.672404  | 2.868869  |
| 1 | 0 | -4.065531 | -0.679005 | 1.767994  |
| 1 | 0 | -2.253357 | 4.640112  | -0.906125 |
| 1 | 0 | -4.058516 | 4.702045  | -0.924165 |
| 1 | 0 | -3.174380 | 5.007489  | 0.584070  |
| 1 | 0 | -3.571283 | 3.060858  | 2.086817  |
| 1 | 0 | -2.968814 | 2.176259  | -1.987696 |
| 1 | 0 | -3.321923 | -0.202958 | -0.578617 |
| 1 | 0 | -0.254231 | -5.378702 | -0.551046 |
| 1 | 0 | -0.916290 | -4.643474 | 0.935336  |
| 1 | 0 | -1.934258 | -4.747138 | -0.527386 |
| 1 | 0 | -1.782680 | -0.355137 | -2.691453 |
| 1 | 0 | -0.568582 | 0.683327  | -1.922671 |
| 1 | 0 | -1.934958 | -2.754158 | -2.042216 |
| 1 | 0 | 1.342945  | -0.544478 | -0.518193 |
| 1 | 0 | 1.257895  | -3.034120 | 0.719998  |
| 1 | 0 | -2.550629 | -0.779762 | 3.729930  |
| 1 | 0 | -1.917945 | 0.824183  | 3.368054  |
| 1 | 0 | -0.307261 | 0.570575  | -4.391094 |
| 1 | 0 | -0.076695 | -1.174871 | -4.319061 |
| 1 | 0 | 4.652552  | 4.624087  | 0.032082  |
| 1 | 0 | 6.037382  | 3.534845  | -0.206966 |
| 1 | 0 | 1.872970  | 0.332532  | 3.153740  |
| 1 | 0 | 1.977651  | 1.865476  | 4.070741  |
| 1 | 0 | 1.085259  | 1.793267  | 2.515032  |
| 1 | 0 | 2.441881  | 3.352682  | 1.072912  |
| 1 | 0 | 4.546642  | 0.306808  | 3.116851  |
| 1 | 0 | 6.281880  | 1.596085  | 1.333573  |
| 1 | 0 | 6.637395  | -1.819949 | -4.172240 |
| 1 | 0 | 5.502402  | -0.446676 | -3.998527 |
| 1 | 0 | 7.164854  | -0.295765 | -3.384277 |
| 1 | 0 | 6.981358  | -1.120512 | 1.473848  |
| 1 | 0 | 5.456628  | -1.909846 | 1.929314  |
| 1 | 0 | 7.557191  | -0.882450 | -0.994028 |
| 1 | 0 | 3.950138  | -2.821227 | 0.041143  |
| 1 | 0 | 3.955710  | -2.289973 | -2.704280 |
| 1 | 0 | 4.739109  | 3.785051  | -2.295198 |
| 1 | 0 | 3.256225  | 3.257575  | -1.492256 |
| 1 | 0 | 7.425345  | -3.223806 | 2.652027  |
| 1 | 0 | 8.020470  | -3.323613 | 0.998693  |
| 1 | 0 | 6.835934  | -5.446478 | 1.713229  |
| 1 | 0 | 5.340410  | -4.520094 | 1.971176  |
| 1 | 0 | 6.009396  | -4.700923 | 0.340947  |
| 1 | 0 | 4.243314  | 0.980574  | -1.110106 |
| 1 | 0 | 5.768783  | 1.509859  | -1.861647 |
| 1 | 0 | 4.275650  | 1.393905  | -2.825115 |
| 1 | 0 | 2.060261  | -0.837344 | -3.008127 |
| 1 | 0 | 2.117980  | 0.067843  | -4.529185 |
| 1 | 0 | 1.783475  | 0.905852  | -2.994546 |
| 1 | 0 | -0.388259 | -1.044697 | 2.529033  |
| 1 | 0 | -1.686966 | -1.574020 | 1.447778  |
| 1 | 0 | -0.934686 | 0.020846  | 1.231122  |

### Hexamer

\*\*\* imCH3\_BF4\_b3lyp\_6-31+Gp\_hexamer\_D3.g09, E(RB3LYP) = -4851.76568712,  
9.11.2015

|   |   |          |          |           |
|---|---|----------|----------|-----------|
| 7 | 0 | 5.574445 | 0.438808 | -2.388828 |
| 6 | 0 | 5.457110 | 0.328387 | -1.063250 |
| 7 | 0 | 6.177404 | 1.295693 | -0.486599 |

|   |   |            |           |           |
|---|---|------------|-----------|-----------|
| 6 | 0 | 6.785528   | 2.049061  | -1.477958 |
| 6 | 0 | 6.394221   | 1.517207  | -2.670359 |
| 6 | 0 | 6.266568   | 1.512095  | 0.967742  |
| 6 | 0 | 5.401911   | 2.682340  | 1.455213  |
| 6 | 0 | 5.845594   | 4.054599  | 0.935023  |
| 6 | 0 | 4.898308   | -0.418893 | -3.360978 |
| 6 | 0 | 8.336864   | -1.377043 | -1.530653 |
| 6 | 0 | 9.768561   | -1.814001 | -1.220275 |
| 6 | 0 | 9.925591   | -2.455142 | 0.163910  |
| 7 | 0 | 9.749248   | -1.492501 | 1.273284  |
| 6 | 0 | 8.605693   | -1.314333 | 2.030952  |
| 6 | 0 | 8.877609   | -0.319765 | 2.925224  |
| 7 | 0 | 10.176293  | 0.096102  | 2.698592  |
| 6 | 0 | 10.673882  | -0.616142 | 1.684356  |
| 6 | 0 | 10.890321  | 1.131080  | 3.451634  |
| 9 | 0 | 6.812712   | -3.442012 | 0.571953  |
| 5 | 0 | 5.468441   | -3.017210 | 0.594066  |
| 9 | 0 | 5.394589   | -1.781723 | 1.320213  |
| 9 | 0 | 4.653509   | -3.969728 | 1.215510  |
| 9 | 0 | 5.016279   | -2.772791 | -0.724776 |
| 9 | 0 | 9.331326   | 1.208615  | -0.020569 |
| 5 | 0 | 9.851775   | 2.457925  | 0.427176  |
| 9 | 0 | 9.587157   | 3.441174  | -0.529518 |
| 9 | 0 | 9.194066   | 2.788664  | 1.648731  |
| 9 | 0 | 11.232818  | 2.306550  | 0.666559  |
| 1 | 0 | 10.923209  | -2.889949 | 0.283236  |
| 1 | 0 | 9.185011   | -3.242403 | 0.320687  |
| 1 | 0 | 10.230277  | 1.990152  | 3.564646  |
| 1 | 0 | 11.194480  | 0.729332  | 4.422164  |
| 1 | 0 | 11.753985  | 1.450408  | 2.869940  |
| 1 | 0 | 11.644277  | -0.465967 | 1.238760  |
| 1 | 0 | 8.262679   | 0.136682  | 3.684385  |
| 1 | 0 | 7.712671   | -1.893289 | 1.852173  |
| 1 | 0 | 4.030189   | 0.107885  | -3.763457 |
| 1 | 0 | 5.599166   | -0.667011 | -4.161395 |
| 1 | 0 | 4.591206   | -1.333747 | -2.851743 |
| 1 | 0 | 5.957337   | 0.571766  | 1.430484  |
| 1 | 0 | 7.316420   | 1.685465  | 1.200985  |
| 1 | 0 | 4.935992   | -0.460846 | -0.549014 |
| 1 | 0 | 7.478280   | 2.843383  | -1.247006 |
| 1 | 0 | 6.610276   | 1.816325  | -3.683161 |
| 1 | 0 | 10.104872  | -2.563873 | -1.949128 |
| 1 | 0 | 10.448204  | -0.956596 | -1.300468 |
| 1 | 0 | 5.463699   | 2.666211  | 2.552354  |
| 1 | 0 | 4.353265   | 2.505150  | 1.188599  |
| 1 | 0 | 5.287129   | 4.851846  | 1.438676  |
| 1 | 0 | 6.915214   | 4.216836  | 1.111791  |
| 1 | 0 | 5.652285   | 4.153435  | -0.138299 |
| 1 | 0 | 8.009319   | -0.622242 | -0.813849 |
| 1 | 0 | 7.641590   | -2.220866 | -1.489945 |
| 1 | 0 | 8.288163   | -0.921129 | -2.525339 |
| 7 | 0 | -9.685881  | 2.924498  | -0.397064 |
| 6 | 0 | -9.918656  | 2.025978  | 0.566641  |
| 7 | 0 | -8.868760  | 2.005671  | 1.395493  |
| 6 | 0 | -7.926454  | 2.916062  | 0.947426  |
| 6 | 0 | -8.442785  | 3.496948  | -0.173183 |
| 6 | 0 | -8.750073  | 1.111050  | 2.565756  |
| 6 | 0 | -9.068175  | 1.813972  | 3.889676  |
| 6 | 0 | -8.093883  | 2.940020  | 4.255666  |
| 6 | 0 | -10.569765 | 3.191182  | -1.533892 |
| 6 | 0 | -7.942414  | 0.362074  | -1.771030 |
| 6 | 0 | -6.897976  | -0.652233 | -2.240503 |
| 6 | 0 | -7.118746  | -2.066693 | -1.687966 |
| 7 | 0 | -6.867846  | -2.159162 | -0.236735 |



|   |   |            |           |           |
|---|---|------------|-----------|-----------|
| 6 | 0 | -7.812167  | -2.064415 | 0.770882  |
| 6 | 0 | -7.133552  | -2.163405 | 1.950783  |
| 7 | 0 | -5.792643  | -2.316203 | 1.646299  |
| 6 | 0 | -5.656574  | -2.300157 | 0.317908  |
| 6 | 0 | -4.697144  | -2.452638 | 2.613099  |
| 9 | 0 | -10.318914 | -1.904371 | -1.143370 |
| 5 | 0 | -11.283426 | -1.088757 | -0.504980 |
| 9 | 0 | -10.802779 | -0.804899 | 0.823145  |
| 9 | 0 | -12.518582 | -1.702843 | -0.449334 |
| 9 | 0 | -11.364720 | 0.159314  | -1.193715 |
| 9 | 0 | -6.000262  | 0.631562  | 0.778741  |
| 5 | 0 | -5.037270  | 0.982667  | 1.757548  |
| 9 | 0 | -4.777757  | 2.374568  | 1.654565  |
| 9 | 0 | -5.556247  | 0.688510  | 3.038737  |
| 9 | 0 | -3.859813  | 0.252571  | 1.535577  |
| 6 | 0 | -2.305601  | 0.483447  | -0.984605 |
| 7 | 0 | -1.381130  | 0.498964  | -2.018271 |
| 6 | 0 | -0.944965  | 1.752700  | -2.189831 |
| 7 | 0 | -1.566691  | 2.542042  | -1.303984 |
| 6 | 0 | -2.428200  | 1.767859  | -0.542654 |
| 6 | 0 | -0.905207  | -0.658494 | -2.798523 |
| 6 | 0 | -1.880474  | -1.093184 | -3.897698 |
| 6 | 0 | -3.218821  | -1.631108 | -3.377381 |
| 6 | 0 | -1.314903  | 3.972829  | -1.123155 |
| 9 | 0 | -0.923870  | -3.547178 | -1.230847 |
| 5 | 0 | -1.363576  | -3.039837 | 0.018044  |
| 9 | 0 | -2.762945  | -2.772888 | -0.074169 |
| 9 | 0 | -1.106096  | -3.956882 | 1.038213  |
| 9 | 0 | -0.703518  | -1.816832 | 0.278444  |
| 6 | 0 | 0.493321   | 1.214928  | 1.092775  |
| 6 | 0 | 1.483762   | 0.561105  | 2.058657  |
| 6 | 0 | 2.705927   | -0.038140 | 1.356934  |
| 7 | 0 | 2.371702   | -1.168338 | 0.474639  |
| 6 | 0 | 2.147308   | -1.107310 | -0.890539 |
| 6 | 0 | 1.887519   | -2.380413 | -1.300590 |
| 7 | 0 | 1.947788   | -3.193070 | -0.187568 |
| 6 | 0 | 2.240290   | -2.438283 | 0.871362  |
| 6 | 0 | 1.806583   | -4.649581 | -0.171969 |
| 9 | 0 | 2.988696   | 2.001087  | -1.208843 |
| 5 | 0 | 2.567384   | 2.336715  | -2.521938 |
| 9 | 0 | 1.941749   | 1.170014  | -3.087458 |
| 9 | 0 | 3.657113   | 2.699649  | -3.306784 |
| 9 | 0 | 1.601057   | 3.362101  | -2.461350 |
| 1 | 0 | 3.447459   | -0.407812 | 2.069493  |
| 1 | 0 | 3.181283   | 0.710340  | 0.722373  |
| 1 | 0 | 1.136920   | -4.932469 | -0.983304 |
| 1 | 0 | 2.794734   | -5.102443 | -0.278658 |
| 1 | 0 | 1.344351   | -4.946417 | 0.769713  |
| 1 | 0 | 2.394518   | -2.803850 | 1.872687  |
| 1 | 0 | 1.638500   | -2.776297 | -2.271146 |
| 1 | 0 | 2.177880   | -0.176069 | -1.432337 |
| 1 | 0 | -2.179696  | 4.547431  | -1.465847 |
| 1 | 0 | -1.142740  | 4.166662  | -0.062026 |
| 1 | 0 | -0.422985  | 4.246389  | -1.687721 |
| 1 | 0 | 0.056454   | -0.358704 | -3.221860 |
| 1 | 0 | -0.733744  | -1.468222 | -2.090966 |
| 1 | 0 | -0.181359  | 2.063166  | -2.885022 |
| 1 | 0 | -2.731192  | -0.430842 | -0.605804 |
| 1 | 0 | -3.024411  | 2.177389  | 0.258109  |
| 1 | 0 | 1.864744   | 1.302522  | 2.774264  |
| 1 | 0 | 0.980476   | -0.218828 | 2.644555  |
| 1 | 0 | -1.367609  | -1.881712 | -4.463844 |
| 1 | 0 | -2.043395  | -0.260309 | -4.595524 |
| 1 | 0 | -6.443301  | -2.780595 | -2.169379 |

|   |   |            |           |           |
|---|---|------------|-----------|-----------|
| 1 | 0 | -8.148051  | -2.392867 | -1.849767 |
| 1 | 0 | -4.668439  | -1.557884 | 3.235772  |
| 1 | 0 | -4.868717  | -3.346566 | 3.218561  |
| 1 | 0 | -3.760830  | -2.546071 | 2.064163  |
| 1 | 0 | -4.716881  | -2.399942 | -0.203206 |
| 1 | 0 | -7.480742  | -2.128398 | 2.971143  |
| 1 | 0 | -8.861401  | -1.934376 | 0.552466  |
| 1 | 0 | -11.030979 | 4.176352  | -1.422754 |
| 1 | 0 | -9.980640  | 3.156597  | -2.453195 |
| 1 | 0 | -11.329329 | 2.410273  | -1.574012 |
| 1 | 0 | -9.438300  | 0.284179  | 2.379817  |
| 1 | 0 | -7.729860  | 0.728135  | 2.561564  |
| 1 | 0 | -10.769645 | 1.365539  | 0.620523  |
| 1 | 0 | -6.962308  | 3.021175  | 1.420274  |
| 1 | 0 | -8.029749  | 4.237307  | -0.840177 |
| 1 | 0 | -6.918047  | -0.737658 | -3.335445 |
| 1 | 0 | -5.892836  | -0.311396 | -1.962558 |
| 1 | 0 | -9.034316  | 1.034655  | 4.662341  |
| 1 | 0 | -10.101394 | 2.186729  | 3.868184  |
| 1 | 0 | -8.302672  | 3.317004  | 5.263170  |
| 1 | 0 | -7.057625  | 2.583736  | 4.228436  |
| 1 | 0 | -8.180392  | 3.788547  | 3.566699  |
| 1 | 0 | -7.892775  | 0.483147  | -0.686692 |
| 1 | 0 | -8.955763  | 0.050048  | -2.038963 |
| 1 | 0 | -7.741593  | 1.342703  | -2.219288 |
| 1 | 0 | -3.807179  | -0.845175 | -2.891242 |
| 1 | 0 | -3.820948  | -2.025140 | -4.204364 |
| 1 | 0 | -3.057507  | -2.434880 | -2.650598 |
| 1 | 0 | -0.337732  | 1.668443  | 1.643397  |
| 1 | 0 | 0.986509   | 1.986611  | 0.490170  |
| 1 | 0 | 0.064200   | 0.466484  | 0.422697  |

**[HEMIm][BF<sub>4</sub>]**

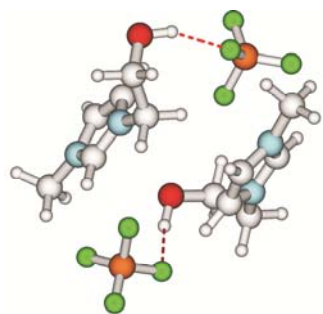

dimer-ca

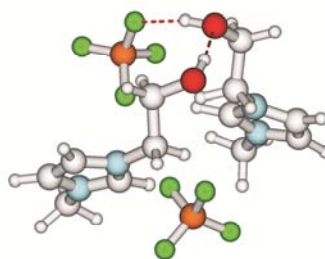

dimer-cc

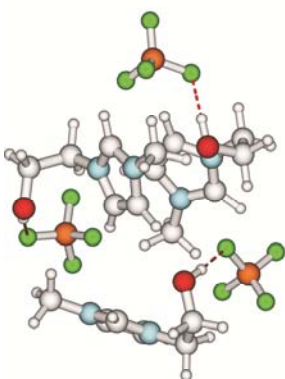

trimer-ca

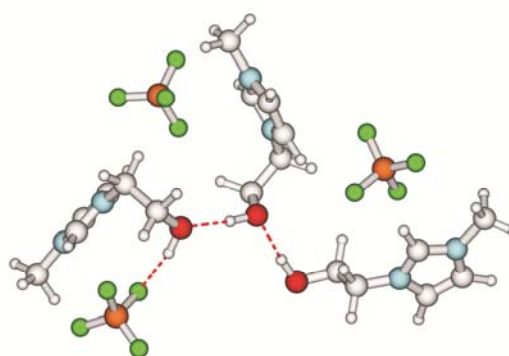

trimer-cc

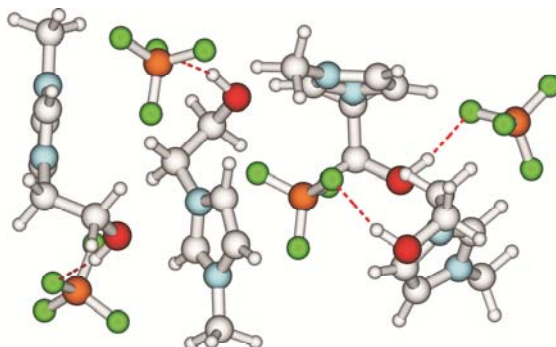

tetramer-ca

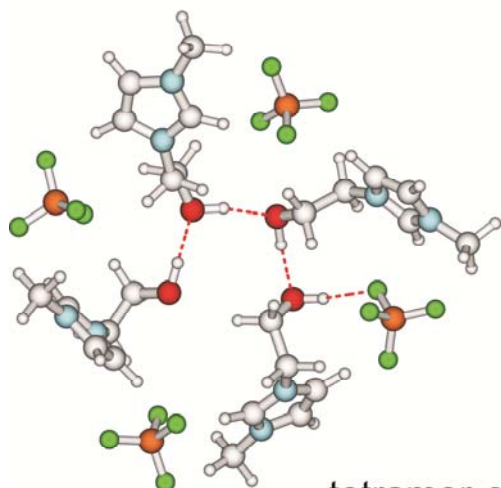

tetramer-cc

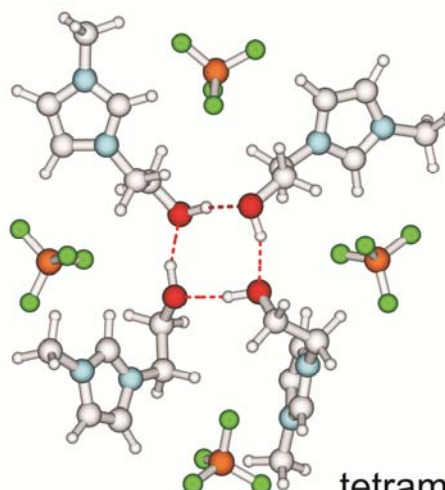

tetramer-cc-cyc

**dimer ca**

\*\*\* imOH\_BF4\_b3lyp\_6-31+Gp\_dimer\_D3.g09, -1689.04027659

|   |   |           |           |           |
|---|---|-----------|-----------|-----------|
| 7 | 0 | -0.537230 | 2.319948  | -0.849060 |
| 6 | 0 | 0.079166  | 2.495557  | 0.378231  |
| 6 | 0 | -0.912544 | 2.535375  | 1.313038  |
| 7 | 0 | -2.116215 | 2.375168  | 0.644149  |
| 6 | 0 | -1.861669 | 2.239428  | -0.660930 |
| 6 | 0 | -3.445624 | 2.364704  | 1.264570  |
| 6 | 0 | 0.153948  | 2.190193  | -2.143103 |
| 6 | 0 | 0.471964  | 0.736349  | -2.516030 |
| 9 | 0 | -3.396662 | -0.575774 | 0.785971  |
| 5 | 0 | -3.434495 | -0.673529 | -0.651724 |
| 9 | 0 | -4.179467 | 0.420674  | -1.145587 |
| 9 | 0 | -2.091476 | -0.547555 | -1.110951 |
| 9 | 0 | -3.962621 | -1.893346 | -1.025618 |
| 9 | 0 | 3.063705  | 1.887146  | -0.557436 |
| 5 | 0 | 3.664061  | 1.276807  | 0.610635  |
| 9 | 0 | 4.605071  | 2.117429  | 1.155981  |
| 9 | 0 | 4.213600  | 0.036264  | 0.207973  |
| 9 | 0 | 2.601133  | 1.015687  | 1.527377  |
| 6 | 0 | 1.839458  | -1.829425 | 0.462156  |
| 7 | 0 | 0.510647  | -1.835911 | 0.598695  |
| 6 | 0 | -0.031927 | -2.712530 | -0.323312 |
| 6 | 0 | 1.013750  | -3.251248 | -1.013232 |
| 7 | 0 | 2.173859  | -2.687739 | -0.505817 |
| 6 | 0 | -0.233465 | -0.942558 | 1.494133  |
| 6 | 0 | -0.991614 | -1.707895 | 2.581816  |
| 6 | 0 | 3.531223  | -2.903695 | -1.006543 |
| 1 | 0 | -0.481997 | 2.643849  | -2.909662 |
| 1 | 0 | 1.072707  | 2.777098  | -2.063693 |
| 1 | 0 | -3.462103 | 1.608232  | 2.049623  |
| 1 | 0 | -3.658887 | 3.356107  | 1.672803  |
| 1 | 0 | -4.180338 | 2.085988  | 0.510694  |
| 1 | 0 | -2.604360 | 2.033660  | -1.415881 |
| 1 | 0 | -0.867805 | 2.654890  | 2.384243  |
| 1 | 0 | 1.152987  | 2.533363  | 0.473610  |
| 1 | 0 | 3.855583  | -3.922107 | -0.775778 |
| 1 | 0 | 3.538433  | -2.745477 | -2.087637 |
| 1 | 0 | 4.194778  | -2.176246 | -0.538432 |
| 1 | 0 | 0.492315  | -0.249400 | 1.926880  |
| 1 | 0 | -0.930319 | -0.381831 | 0.871286  |
| 1 | 0 | 2.522700  | -1.182102 | 0.989228  |
| 1 | 0 | -1.096106 | -2.855575 | -0.405769 |
| 1 | 0 | 1.035111  | -3.970288 | -1.817122 |
| 1 | 0 | 0.954008  | 0.763122  | -3.507669 |
| 8 | 0 | 1.278180  | 0.084090  | -1.559758 |
| 1 | 0 | -0.450823 | 0.156199  | -2.590389 |
| 1 | 0 | -1.442228 | -0.963583 | 3.258327  |
| 8 | 0 | -1.960196 | -2.593838 | 2.056131  |
| 1 | 0 | -0.296218 | -2.317125 | 3.169473  |
| 1 | 0 | 2.051799  | 0.642068  | -1.337432 |
| 1 | 0 | -2.663904 | -2.059752 | 1.637846  |

**trimer ca**

\*\*\* imOH\_BF4\_b3lyp\_6-31+Gp\_trimer\_D3.g09, E(RB3LYP) = -2533.58418824

|   |   |           |           |          |
|---|---|-----------|-----------|----------|
| 7 | 0 | -4.064985 | -0.332992 | 1.265784 |
|---|---|-----------|-----------|----------|

|   |   |           |           |           |
|---|---|-----------|-----------|-----------|
| 6 | 0 | -4.366573 | 0.087975  | -0.017134 |
| 6 | 0 | -4.046948 | 1.412308  | -0.093849 |
| 7 | 0 | -3.547021 | 1.777878  | 1.142664  |
| 6 | 0 | -3.561927 | 0.705278  | 1.944411  |
| 6 | 0 | -3.054134 | 3.110004  | 1.521251  |
| 6 | 0 | -4.252609 | -1.707117 | 1.766127  |
| 6 | 0 | -3.214995 | -2.093921 | 2.830115  |
| 9 | 0 | -1.200337 | -2.755119 | 0.086003  |
| 5 | 0 | -2.248965 | -3.423288 | -0.648734 |
| 9 | 0 | -2.988475 | -4.198180 | 0.246152  |
| 9 | 0 | -1.657500 | -4.185156 | -1.662266 |
| 9 | 0 | -3.072199 | -2.414932 | -1.213638 |
| 1 | 0 | -5.264795 | -1.795689 | 2.177426  |
| 1 | 0 | -4.169918 | -2.362936 | 0.900640  |
| 1 | 0 | -3.045794 | 3.738437  | 0.632533  |
| 1 | 0 | -3.713438 | 3.541050  | 2.278875  |
| 1 | 0 | -2.031650 | 3.035507  | 1.897062  |
| 1 | 0 | -3.194620 | 0.679716  | 2.956888  |
| 1 | 0 | -4.059579 | 2.100315  | -0.925503 |
| 1 | 0 | -4.720804 | -0.604723 | -0.763467 |
| 1 | 0 | -3.308542 | -3.177619 | 2.984089  |
| 8 | 0 | -1.897777 | -1.716386 | 2.485450  |
| 1 | 0 | -3.433877 | -1.602517 | 3.785725  |
| 1 | 0 | -1.628022 | -2.167531 | 1.654516  |
| 7 | 0 | 1.490873  | -1.824402 | -2.014285 |
| 6 | 0 | 1.902852  | -0.500537 | -2.015113 |
| 6 | 0 | 0.842193  | 0.241347  | -2.449100 |
| 7 | 0 | -0.200100 | -0.640459 | -2.689371 |
| 6 | 0 | 0.216195  | -1.881712 | -2.420506 |
| 6 | 0 | -1.536874 | -0.278767 | -3.172868 |
| 6 | 0 | 2.282186  | -2.980378 | -1.567080 |
| 6 | 0 | 2.111410  | -3.256104 | -0.068341 |
| 9 | 0 | -0.390233 | 3.189987  | -2.661729 |
| 5 | 0 | -1.471528 | 3.187293  | -1.776210 |
| 9 | 0 | -2.695580 | 3.045759  | -2.439037 |
| 9 | 0 | -1.315286 | 2.085618  | -0.872322 |
| 9 | 0 | -1.473989 | 4.378244  | -0.996579 |
| 9 | 0 | 4.770713  | -1.318589 | -0.506558 |
| 5 | 0 | 5.291716  | -0.053712 | -0.051899 |
| 9 | 0 | 6.558584  | 0.154176  | -0.542443 |
| 9 | 0 | 5.264380  | -0.068410 | 1.368223  |
| 9 | 0 | 4.384710  | 0.953274  | -0.501779 |
| 6 | 0 | 2.584576  | 1.050780  | 1.832497  |
| 7 | 0 | 1.602320  | 1.587662  | 1.099321  |
| 6 | 0 | 0.417752  | 0.934061  | 1.398354  |
| 6 | 0 | 0.711803  | -0.014583 | 2.333115  |
| 7 | 0 | 2.067941  | 0.080371  | 2.592515  |
| 6 | 0 | 1.770575  | 2.721726  | 0.180761  |
| 6 | 0 | 1.443265  | 4.055000  | 0.862378  |
| 6 | 0 | 2.837700  | -0.806854 | 3.466567  |
| 1 | 0 | 1.960241  | -3.851188 | -2.146188 |
| 1 | 0 | 3.325924  | -2.763694 | -1.804612 |
| 1 | 0 | -1.905102 | 0.559873  | -2.583587 |
| 1 | 0 | -1.478991 | 0.008696  | -4.225703 |
| 1 | 0 | -2.196099 | -1.136956 | -3.040327 |
| 1 | 0 | -0.383754 | -2.778318 | -2.481422 |
| 1 | 0 | 0.717762  | 1.301513  | -2.606186 |
| 1 | 0 | 2.892411  | -0.211067 | -1.691986 |
| 1 | 0 | 2.580287  | -0.608911 | 4.510622  |
| 1 | 0 | 2.605461  | -1.837173 | 3.194305  |
| 1 | 0 | 3.899110  | -0.627111 | 3.292318  |
| 1 | 0 | 2.803258  | 2.698717  | -0.177433 |
| 1 | 0 | 1.101295  | 2.559812  | -0.663768 |
| 1 | 0 | 3.631201  | 1.300292  | 1.766780  |

|   |   |           |           |          |
|---|---|-----------|-----------|----------|
| 1 | 0 | -0.496665 | 1.186975  | 0.889926 |
| 1 | 0 | 0.081046  | -0.757215 | 2.797012 |
| 1 | 0 | 2.701921  | -4.156385 | 0.166449 |
| 8 | 0 | 2.493878  | -2.156891 | 0.736933 |
| 1 | 0 | 1.061096  | -3.458498 | 0.155613 |
| 1 | 0 | 1.692191  | 4.863691  | 0.160144 |
| 8 | 0 | 0.091077  | 4.131250  | 1.284345 |
| 1 | 0 | 2.062804  | 4.179183  | 1.757502 |
| 1 | 0 | 3.401187  | -1.885907 | 0.485405 |
| 1 | 0 | -0.464044 | 4.286925  | 0.494585 |

## tetramer ca

\*\*\* imOH\_BF4\_b3lyp\_6-3l+Gp\_tetramer\_D3.g09, E(RB3LYP) = -3378.11575625

|   |   |          |           |           |
|---|---|----------|-----------|-----------|
| 7 | 0 | 5.957772 | -0.794729 | 0.751501  |
| 6 | 0 | 6.212942 | -0.176621 | -0.460819 |
| 6 | 0 | 6.231346 | -1.159585 | -1.405661 |
| 7 | 0 | 5.980658 | -2.359129 | -0.758375 |
| 6 | 0 | 5.808439 | -2.109700 | 0.543591  |
| 6 | 0 | 5.933334 | -3.679231 | -1.394365 |
| 6 | 0 | 5.806651 | -0.104670 | 2.043320  |
| 6 | 0 | 4.393552 | 0.455038  | 2.256973  |
| 9 | 0 | 2.995800 | -3.162769 | -1.284385 |
| 5 | 0 | 2.731328 | -3.254876 | 0.128969  |
| 9 | 0 | 3.629475 | -4.168190 | 0.700410  |
| 9 | 0 | 2.934716 | -1.973312 | 0.683700  |
| 9 | 0 | 1.399025 | -3.652173 | 0.297071  |
| 9 | 0 | 6.011063 | 2.929302  | 0.357727  |
| 5 | 0 | 5.573146 | 3.560442  | -0.870368 |
| 9 | 0 | 6.603844 | 4.285997  | -1.421564 |
| 9 | 0 | 4.448088 | 4.361730  | -0.569648 |
| 9 | 0 | 5.154025 | 2.509032  | -1.741601 |
| 6 | 0 | 2.195904 | 2.375681  | -0.765900 |
| 7 | 0 | 2.019899 | 1.053219  | -0.858265 |
| 6 | 0 | 1.164873 | 0.643575  | 0.151059  |
| 6 | 0 | 0.807610 | 1.761046  | 0.844937  |
| 7 | 0 | 1.463270 | 2.829155  | 0.256791  |
| 6 | 0 | 2.764845 | 0.191708  | -1.780486 |
| 6 | 0 | 1.861516 | -0.504667 | -2.798164 |
| 6 | 0 | 1.437300 | 4.216333  | 0.720727  |
| 1 | 0 | 6.058364 | -0.816470 | 2.835329  |
| 1 | 0 | 6.546269 | 0.701064  | 2.054315  |
| 1 | 0 | 5.249396 | -3.635409 | -2.242138 |
| 1 | 0 | 6.938919 | -3.960159 | -1.718435 |
| 1 | 0 | 5.540366 | -4.398710 | -0.677586 |
| 1 | 0 | 5.531266 | -2.844271 | 1.283108  |
| 1 | 0 | 6.397214 | -1.110398 | -2.470455 |
| 1 | 0 | 6.325500 | 0.893209  | -0.543056 |
| 1 | 0 | 0.512065 | 4.703098  | 0.399334  |
| 1 | 0 | 1.494438 | 4.220243  | 1.811226  |
| 1 | 0 | 2.304819 | 4.737044  | 0.313310  |
| 1 | 0 | 3.503369 | 0.824042  | -2.279433 |
| 1 | 0 | 3.295352 | -0.545290 | -1.176317 |
| 1 | 0 | 2.881401 | 2.963737  | -1.355126 |
| 1 | 0 | 0.924277 | -0.390555 | 0.319746  |
| 1 | 0 | 0.165661 | 1.875960  | 1.704652  |
| 1 | 0 | 4.388301 | 0.945372  | 3.244247  |
| 8 | 0 | 3.998569 | 1.333134  | 1.228389  |
| 1 | 0 | 3.662541 | -0.357145 | 2.268188  |
| 1 | 0 | 2.500135 | -0.950925 | -3.574803 |
| 8 | 0 | 1.022136 | -1.489318 | -2.207510 |
| 1 | 0 | 1.201051 | 0.223079  | -3.281994 |

|   |   |           |           |           |
|---|---|-----------|-----------|-----------|
| 1 | 0 | 4.676094  | 2.025410  | 1.081383  |
| 1 | 0 | 1.595602  | -2.231450 | -1.929223 |
| 7 | 0 | -2.416142 | -2.000209 | -0.997043 |
| 6 | 0 | -3.653124 | -2.274386 | -0.442454 |
| 6 | 0 | -3.417455 | -2.939246 | 0.725498  |
| 7 | 0 | -2.045656 | -3.056814 | 0.865758  |
| 6 | 0 | -1.461204 | -2.473673 | -0.184641 |
| 6 | 0 | -1.353946 | -3.664740 | 2.007707  |
| 6 | 0 | -2.174625 | -1.245452 | -2.235896 |
| 6 | 0 | -2.185493 | 0.270841  | -2.013007 |
| 9 | 0 | -2.394627 | -0.875434 | 3.353879  |
| 5 | 0 | -1.441950 | -0.140280 | 2.581980  |
| 9 | 0 | -0.220073 | -0.818342 | 2.556099  |
| 9 | 0 | -1.936387 | -0.011049 | 1.262727  |
| 9 | 0 | -1.302800 | 1.147730  | 3.142437  |
| 9 | 0 | -5.288562 | -0.734299 | -2.954985 |
| 5 | 0 | -6.611486 | -0.597688 | -2.398083 |
| 9 | 0 | -7.508266 | -1.382181 | -3.082883 |
| 9 | 0 | -6.956096 | 0.777534  | -2.441191 |
| 9 | 0 | -6.520457 | -0.983903 | -1.023836 |
| 6 | 0 | -5.603862 | 1.747310  | 0.082294  |
| 7 | 0 | -4.908051 | 1.363722  | 1.156968  |
| 6 | 0 | -3.918727 | 2.298848  | 1.408340  |
| 6 | 0 | -4.048651 | 3.268021  | 0.458099  |
| 7 | 0 | -5.108407 | 2.907236  | -0.357491 |
| 6 | 0 | -5.111632 | 0.089842  | 1.861187  |
| 6 | 0 | -5.478102 | 0.280469  | 3.334501  |
| 6 | 0 | -5.511978 | 3.576763  | -1.593100 |
| 1 | 0 | -1.198096 | -1.550269 | -2.616820 |
| 1 | 0 | -2.952929 | -1.535606 | -2.946290 |
| 1 | 0 | -1.580441 | -3.082118 | 2.901518  |
| 1 | 0 | -1.693666 | -4.697896 | 2.117312  |
| 1 | 0 | -0.282486 | -3.642988 | 1.817360  |
| 1 | 0 | -0.397913 | -2.405934 | -0.349992 |
| 1 | 0 | -4.096841 | -3.326942 | 1.468083  |
| 1 | 0 | -4.573660 | -1.959560 | -0.911536 |
| 1 | 0 | -5.841164 | 4.595361  | -1.371366 |
| 1 | 0 | -4.659671 | 3.593619  | -2.276998 |
| 1 | 0 | -6.320028 | 3.006151  | -2.051458 |
| 1 | 0 | -5.901779 | -0.444846 | 1.326911  |
| 1 | 0 | -4.184841 | -0.475481 | 1.766190  |
| 1 | 0 | -6.392366 | 1.184857  | -0.392391 |
| 1 | 0 | -3.221461 | 2.179068  | 2.220854  |
| 1 | 0 | -3.481200 | 4.168758  | 0.284323  |
| 1 | 0 | -1.837175 | 0.732334  | -2.952944 |
| 8 | 0 | -3.448593 | 0.782721  | -1.629494 |
| 1 | 0 | -1.485350 | 0.534871  | -1.215303 |
| 1 | 0 | -5.702633 | -0.715209 | 3.749096  |
| 8 | 0 | -4.471281 | 0.943035  | 4.076866  |
| 1 | 0 | -6.381428 | 0.893415  | 3.424923  |
| 1 | 0 | -4.137572 | 0.392802  | -2.205997 |
| 1 | 0 | -3.670905 | 0.384335  | 4.082781  |

**dimer cc**

\*\*\* imOH\_BF4\_cation\_cation\_b3lyp\_6-31+Gp\_dimer\_D3.g09, E(RB3LYP) = -1689.03077609

|   |   |           |           |           |
|---|---|-----------|-----------|-----------|
| 6 | 0 | 0.661378  | -3.831511 | -0.936789 |
| 6 | 0 | -0.205805 | -3.091176 | -1.682808 |
| 7 | 0 | -0.599404 | -2.021456 | -0.898186 |
| 6 | 0 | 0.012666  | -2.107397 | 0.286650  |
| 7 | 0 | 0.777986  | -3.201704 | 0.290184  |

|   |   |           |           |           |
|---|---|-----------|-----------|-----------|
| 6 | 0 | -1.402857 | -0.871893 | -1.318061 |
| 6 | 0 | -2.899534 | -1.169905 | -1.497565 |
| 8 | 0 | -3.611299 | 0.067730  | -1.497458 |
| 6 | 0 | 1.737561  | -3.544597 | 1.340480  |
| 9 | 0 | -2.839695 | 0.841067  | 1.062326  |
| 5 | 0 | -2.476290 | -0.137043 | 2.077163  |
| 9 | 0 | -2.730395 | -1.414351 | 1.540804  |
| 9 | 0 | -1.072920 | -0.007463 | 2.281446  |
| 9 | 0 | -3.179143 | 0.105535  | 3.234614  |
| 8 | 0 | -2.410707 | 2.397951  | -2.669753 |
| 6 | 0 | -1.737183 | 2.837716  | -1.503548 |
| 6 | 0 | -0.242950 | 2.502440  | -1.646063 |
| 7 | 0 | 0.515219  | 2.595114  | -0.380891 |
| 6 | 0 | 0.038845  | 2.335858  | 0.894814  |
| 6 | 0 | 1.120946  | 2.281362  | 1.720145  |
| 7 | 0 | 2.241439  | 2.502569  | 0.942785  |
| 6 | 0 | 1.851693  | 2.672853  | -0.323621 |
| 6 | 0 | 3.626221  | 2.401864  | 1.406396  |
| 9 | 0 | 3.749402  | 0.456090  | -0.861953 |
| 5 | 0 | 2.726031  | -0.475675 | -0.599073 |
| 9 | 0 | 3.091450  | -1.770955 | -0.985665 |
| 9 | 0 | 1.550981  | -0.075589 | -1.300465 |
| 9 | 0 | 2.433450  | -0.468357 | 0.795768  |
| 1 | 0 | -0.556121 | -3.215655 | -2.695321 |
| 1 | 0 | -0.088428 | -1.394123 | 1.092866  |
| 1 | 0 | -1.288622 | -0.119819 | -0.539434 |
| 1 | 0 | -0.960461 | -0.483636 | -2.237975 |
| 1 | 0 | -3.099882 | -1.648712 | -2.461188 |
| 1 | 0 | -3.249670 | -1.819912 | -0.690694 |
| 1 | 0 | -3.646381 | 0.369847  | -0.566104 |
| 1 | 0 | -2.895647 | 1.575752  | -2.442917 |
| 1 | 0 | -1.874158 | 3.921271  | -1.401404 |
| 1 | 0 | -2.157982 | 2.361633  | -0.613152 |
| 1 | 0 | -0.123323 | 1.481773  | -2.008420 |
| 1 | 0 | 0.229215  | 3.173466  | -2.368465 |
| 1 | 0 | 2.513030  | 2.761981  | -1.170144 |
| 1 | 0 | -1.001574 | 2.165066  | 1.113224  |
| 1 | 0 | 1.184359  | 2.067026  | 2.774891  |
| 1 | 0 | 3.823594  | 1.361792  | 1.670007  |
| 1 | 0 | 4.293579  | 2.690788  | 0.595248  |
| 1 | 0 | 3.765482  | 3.063539  | 2.264576  |
| 1 | 0 | 1.714978  | -4.623485 | 1.508921  |
| 1 | 0 | 2.728472  | -3.214482 | 1.022107  |
| 1 | 0 | 1.454899  | -3.022963 | 2.255356  |
| 1 | 0 | 1.221250  | -4.722133 | -1.174027 |

### trimer cc

\*\*\* imOH\_BF4\_cation\_cation\_b3lyp\_6-31+Gp\_trimer\_D3.g09, E(RB3LYP) = -2533.55624132

|   |   |           |           |           |
|---|---|-----------|-----------|-----------|
| 6 | 0 | -5.585765 | 0.961949  | -0.302834 |
| 7 | 0 | -4.689276 | -0.028361 | -0.194928 |
| 6 | 0 | -4.573977 | -0.383411 | 1.137490  |
| 6 | 0 | -5.436725 | 0.411900  | 1.831719  |
| 7 | 0 | -6.061912 | 1.239849  | 0.914199  |
| 6 | 0 | -3.868026 | -0.582323 | -1.284923 |
| 6 | 0 | -2.772240 | 0.398536  | -1.729217 |
| 8 | 0 | -2.046564 | 0.902319  | -0.613377 |
| 6 | 0 | -7.008587 | 2.307810  | 1.242909  |
| 9 | 0 | -2.195610 | -2.565982 | 1.384621  |
| 5 | 0 | -2.805441 | -3.640369 | 0.661759  |
| 9 | 0 | -2.498236 | -3.462043 | -0.716573 |



|   |   |           |           |           |
|---|---|-----------|-----------|-----------|
| 9 | 0 | -4.184654 | -3.599599 | 0.854284  |
| 9 | 0 | -2.238370 | -4.854902 | 1.102979  |
| 8 | 0 | 0.477507  | 0.471150  | 0.193863  |
| 6 | 0 | 0.240388  | -0.360835 | 1.330083  |
| 6 | 0 | 1.242686  | -1.511106 | 1.338681  |
| 7 | 0 | 1.053149  | -2.411625 | 0.193557  |
| 6 | 0 | 0.388980  | -3.572932 | 0.223134  |
| 7 | 0 | 0.377482  | -4.089881 | -1.008130 |
| 6 | 0 | 1.050446  | -3.223150 | -1.854391 |
| 6 | 0 | 1.476132  | -2.169621 | -1.100493 |
| 6 | 0 | -0.296665 | -5.326588 | -1.406957 |
| 8 | 0 | 1.738428  | 2.696851  | 1.178978  |
| 6 | 0 | 3.104073  | 2.368695  | 1.240799  |
| 6 | 0 | 3.818050  | 2.926679  | -0.006416 |
| 7 | 0 | 5.272088  | 2.691574  | 0.063499  |
| 6 | 0 | 6.129367  | 3.224898  | 1.010529  |
| 6 | 0 | 7.341583  | 2.623624  | 0.837814  |
| 7 | 0 | 7.206643  | 1.735300  | -0.214178 |
| 6 | 0 | 5.946207  | 1.791189  | -0.657086 |
| 6 | 0 | 8.206761  | 0.753336  | -0.644293 |
| 9 | 0 | 4.217561  | -2.241659 | 0.253760  |
| 5 | 0 | 4.798364  | -1.015419 | -0.057326 |
| 9 | 0 | 3.840524  | -0.194998 | -0.751187 |
| 9 | 0 | 5.926049  | -1.163886 | -0.897095 |
| 9 | 0 | 5.183127  | -0.322749 | 1.115214  |
| 9 | 0 | -3.474434 | 4.967013  | -1.197835 |
| 5 | 0 | -4.239479 | 3.857378  | -0.908904 |
| 9 | 0 | -3.541608 | 3.011624  | 0.047853  |
| 9 | 0 | -5.483761 | 4.187443  | -0.340433 |
| 9 | 0 | -4.465063 | 3.063787  | -2.070301 |
| 1 | 0 | -2.480930 | 1.735025  | -0.315988 |
| 1 | 0 | -4.524660 | -0.827649 | -2.125952 |
| 1 | 0 | -3.435912 | -1.508746 | -0.911060 |
| 1 | 0 | -2.073794 | -0.151719 | -2.369467 |
| 1 | 0 | -3.198399 | 1.229382  | -2.298449 |
| 1 | 0 | -0.399830 | 0.687367  | -0.208450 |
| 1 | 0 | -0.781461 | -0.749966 | 1.311912  |
| 1 | 0 | 0.382770  | 0.216767  | 2.255174  |
| 1 | 0 | 2.270379  | -1.147780 | 1.291335  |
| 1 | 0 | 1.124268  | -2.104925 | 2.248905  |
| 1 | 0 | 1.254884  | 1.962465  | 0.730988  |
| 1 | 0 | 3.287225  | 1.289903  | 1.299182  |
| 1 | 0 | 3.523615  | 2.834394  | 2.142444  |
| 1 | 0 | 3.641503  | 4.001937  | -0.095788 |
| 1 | 0 | 3.446499  | 2.424796  | -0.900991 |
| 1 | 0 | -0.113788 | -3.995302 | 1.078811  |
| 1 | 0 | 1.175862  | -3.439979 | -2.903560 |
| 1 | 0 | 2.066414  | -1.299672 | -1.336397 |
| 1 | 0 | 5.805492  | 3.978420  | 1.711049  |
| 1 | 0 | 8.276254  | 2.747123  | 1.362333  |
| 1 | 0 | 5.523026  | 1.161731  | -1.422613 |
| 1 | 0 | -3.912380 | -1.175904 | 1.453498  |
| 1 | 0 | -5.665067 | 0.458245  | 2.884890  |
| 1 | 0 | -5.816903 | 1.505565  | -1.206082 |
| 1 | 0 | 7.985128  | 0.443745  | -1.665009 |
| 1 | 0 | 9.195136  | 1.214893  | -0.598128 |
| 1 | 0 | 8.147227  | -0.121914 | 0.005231  |
| 1 | 0 | -7.451180 | 2.685659  | 0.322764  |
| 1 | 0 | -7.781934 | 1.902967  | 1.900181  |
| 1 | 0 | -6.471665 | 3.128057  | 1.721498  |
| 1 | 0 | -1.037351 | -5.091462 | -2.172951 |
| 1 | 0 | 0.443557  | -6.036670 | -1.785369 |
| 1 | 0 | -0.819230 | -5.733602 | -0.542335 |

tetramer cc

\*\*\* imOH\_BF4\_cation\_cation\_b3lyp\_6-31+Gp\_tetramer\_l\_D3.g09, E(RB3LYP) = -  
3378.10686835

|   |   |           |           |           |
|---|---|-----------|-----------|-----------|
| 6 | 0 | 3.375127  | 4.822319  | -0.243667 |
| 7 | 0 | 3.238869  | 3.479826  | 0.071855  |
| 6 | 0 | 4.434876  | 2.991169  | 0.420134  |
| 7 | 0 | 5.337828  | 3.975509  | 0.342540  |
| 6 | 0 | 4.692573  | 5.131395  | -0.069533 |
| 6 | 0 | 2.021850  | 2.664146  | -0.086616 |
| 6 | 0 | 1.744314  | 2.365880  | -1.571063 |
| 8 | 0 | 0.722161  | 1.384699  | -1.671094 |
| 6 | 0 | 6.763847  | 3.840066  | 0.647752  |
| 8 | 0 | 1.463272  | -1.225182 | -1.576939 |
| 6 | 0 | 2.237157  | -1.797734 | -0.531249 |
| 6 | 0 | 3.174882  | -2.865097 | -1.119108 |
| 7 | 0 | 3.772144  | -3.672863 | -0.039755 |
| 6 | 0 | 4.665224  | -3.229202 | 0.922698  |
| 6 | 0 | 4.843997  | -4.262017 | 1.795925  |
| 7 | 0 | 4.056401  | -5.314878 | 1.357730  |
| 6 | 0 | 3.418752  | -4.930807 | 0.246307  |
| 6 | 0 | 3.924803  | -6.624071 | 2.002301  |
| 8 | 0 | -1.862225 | 1.235709  | -0.757099 |
| 6 | 0 | -2.562653 | 2.150290  | -1.586661 |
| 6 | 0 | -3.844648 | 2.573603  | -0.877912 |
| 7 | 0 | -3.556742 | 3.169312  | 0.439494  |
| 6 | 0 | -2.989819 | 4.365089  | 0.640958  |
| 7 | 0 | -2.806160 | 4.533094  | 1.956153  |
| 6 | 0 | -3.264271 | 3.400903  | 2.611122  |
| 6 | 0 | -3.732687 | 2.543995  | 1.658496  |
| 6 | 0 | -2.197713 | 5.702780  | 2.596300  |
| 9 | 0 | -5.243987 | -0.208981 | 1.341537  |
| 5 | 0 | -6.365466 | 0.184626  | 0.517210  |
| 9 | 0 | -7.426001 | -0.696671 | 0.761430  |
| 9 | 0 | -5.943862 | 0.036349  | -0.835728 |
| 9 | 0 | -6.680369 | 1.511262  | 0.786897  |
| 8 | 0 | -0.834182 | -2.629955 | -1.115252 |
| 6 | 0 | -1.379374 | -2.026639 | 0.059726  |
| 6 | 0 | -2.389172 | -2.928202 | 0.772669  |
| 7 | 0 | -3.482600 | -3.342075 | -0.118642 |
| 6 | 0 | -4.639212 | -2.682293 | -0.258486 |
| 7 | 0 | -5.367651 | -3.297165 | -1.195954 |
| 6 | 0 | -4.646004 | -4.380147 | -1.675072 |
| 6 | 0 | -3.460938 | -4.409245 | -0.999536 |
| 6 | 0 | -6.694308 | -2.869433 | -1.658404 |
| 9 | 0 | 4.403878  | 0.489103  | -1.422278 |
| 5 | 0 | 5.482836  | 0.035874  | -0.637864 |
| 9 | 0 | 5.903417  | -1.232860 | -1.056004 |
| 9 | 0 | 5.004788  | -0.064141 | 0.722927  |
| 9 | 0 | 6.532393  | 0.967222  | -0.662982 |
| 9 | 0 | -1.167287 | -5.933750 | 0.507735  |
| 5 | 0 | 0.188337  | -5.592213 | 0.482390  |
| 9 | 0 | 0.475221  | -4.614106 | 1.454756  |
| 9 | 0 | 0.484238  | -4.998333 | -0.805161 |
| 9 | 0 | 1.013089  | -6.714251 | 0.646754  |
| 9 | 0 | -0.463124 | 4.694162  | -1.223192 |
| 5 | 0 | -0.111110 | 5.817368  | -0.436924 |
| 9 | 0 | -1.242087 | 6.651500  | -0.286217 |
| 9 | 0 | 0.301645  | 5.348161  | 0.841915  |
| 9 | 0 | 0.945434  | 6.516307  | -1.042148 |
| 1 | 0 | -0.910925 | 1.299939  | -1.000090 |

|   |   |           |           |           |
|---|---|-----------|-----------|-----------|
| 1 | 0 | -4.392572 | 3.308622  | -1.475089 |
| 1 | 0 | -4.499263 | 1.721103  | -0.706536 |
| 1 | 0 | -2.854120 | 1.684955  | -2.541689 |
| 1 | 0 | -1.941040 | 3.026444  | -1.804636 |
| 1 | 0 | -0.411277 | -3.490507 | -0.908208 |
| 1 | 0 | -1.842628 | -1.091166 | -0.266385 |
| 1 | 0 | -0.590207 | -1.786258 | 0.786824  |
| 1 | 0 | -1.914681 | -3.834915 | 1.150156  |
| 1 | 0 | -2.832788 | -2.386020 | 1.612722  |
| 1 | 0 | 0.597330  | -1.699246 | -1.611037 |
| 1 | 0 | 1.595177  | -2.261828 | 0.228679  |
| 1 | 0 | 2.825694  | -1.003567 | -0.065668 |
| 1 | 0 | 3.978651  | -2.403294 | -1.693467 |
| 1 | 0 | 2.604075  | -3.546672 | -1.752976 |
| 1 | 0 | 1.112663  | 0.477814  | -1.652841 |
| 1 | 0 | 1.382899  | 3.270282  | -2.066639 |
| 1 | 0 | 2.663178  | 2.016776  | -2.054665 |
| 1 | 0 | 2.191760  | 1.728514  | 0.451899  |
| 1 | 0 | 1.188132  | 3.205010  | 0.364544  |
| 1 | 0 | -4.920883 | -1.799607 | 0.299402  |
| 1 | 0 | -5.041295 | -5.031401 | -2.438955 |
| 1 | 0 | -2.626615 | -5.092318 | -1.034070 |
| 1 | 0 | 5.081915  | -2.234454 | 0.891213  |
| 1 | 0 | 5.455599  | -4.340756 | 2.681232  |
| 1 | 0 | 2.708001  | -5.525151 | -0.304284 |
| 1 | 0 | 4.639189  | 1.967957  | 0.697472  |
| 1 | 0 | 5.221557  | 6.062475  | -0.201070 |
| 1 | 0 | 2.535320  | 5.432455  | -0.547631 |
| 1 | 0 | -4.193605 | 1.570170  | 1.729979  |
| 1 | 0 | -3.227288 | 3.313952  | 3.685724  |
| 1 | 0 | -2.689044 | 5.069624  | -0.119531 |
| 1 | 0 | 3.033480  | -7.115286 | 1.612117  |
| 1 | 0 | 4.816168  | -7.225893 | 1.805042  |
| 1 | 0 | 3.807365  | -6.474784 | 3.077793  |
| 1 | 0 | 7.336937  | 4.376861  | -0.111233 |
| 1 | 0 | 6.974201  | 4.258225  | 1.636166  |
| 1 | 0 | 7.028201  | 2.783295  | 0.607787  |
| 1 | 0 | -2.014027 | 6.462403  | 1.838544  |
| 1 | 0 | -2.877297 | 6.079247  | 3.365173  |
| 1 | 0 | -1.240068 | 5.414933  | 3.034399  |
| 1 | 0 | -6.591922 | -2.328296 | -2.601864 |
| 1 | 0 | -7.316658 | -3.756604 | -1.794650 |
| 1 | 0 | -7.135195 | -2.208026 | -0.913261 |

### tetramer cc\_cyc

\*\*\* imOH\_BF4\_cation\_cation\_b3lyp\_6-31+Gp\_tetramer\_D3.g09, E(RB3LYP) = -3378.11423979

|   |   |           |           |           |
|---|---|-----------|-----------|-----------|
| 6 | 0 | -3.142778 | 3.321540  | 0.143202  |
| 7 | 0 | -3.977421 | 2.392172  | -0.341968 |
| 6 | 0 | -5.279505 | 2.758963  | -0.042073 |
| 6 | 0 | -5.210077 | 3.942325  | 0.629066  |
| 7 | 0 | -3.869314 | 4.276034  | 0.734239  |
| 6 | 0 | -3.605389 | 1.158480  | -1.064034 |
| 6 | 0 | -2.164001 | 1.160890  | -1.535842 |
| 8 | 0 | -1.318939 | 1.095798  | -0.387532 |
| 6 | 0 | -3.335193 | 5.506473  | 1.324291  |
| 9 | 0 | -5.101429 | -0.397462 | 1.344496  |
| 5 | 0 | -6.420761 | -0.381544 | 0.798506  |
| 9 | 0 | -6.296830 | -0.196792 | -0.612844 |
| 9 | 0 | -7.162840 | 0.658950  | 1.345480  |
| 9 | 0 | -7.021599 | -1.639275 | 1.042938  |

|   |   |           |           |           |
|---|---|-----------|-----------|-----------|
| 8 | 0 | -1.028569 | -1.290581 | 0.812209  |
| 6 | 0 | -1.966099 | -1.594068 | 1.842243  |
| 6 | 0 | -2.497342 | -3.010062 | 1.629732  |
| 7 | 0 | -3.205342 | -3.122665 | 0.345247  |
| 6 | 0 | -4.531608 | -3.034450 | 0.184676  |
| 7 | 0 | -4.808850 | -3.091411 | -1.121603 |
| 6 | 0 | -3.615291 | -3.216597 | -1.818219 |
| 6 | 0 | -2.607970 | -3.236545 | -0.898544 |
| 6 | 0 | -6.146903 | -3.018139 | -1.714851 |
| 8 | 0 | 1.607958  | -0.777006 | 1.139046  |
| 6 | 0 | 2.577351  | -1.821023 | 1.087844  |
| 6 | 0 | 2.925462  | -2.120166 | -0.380475 |
| 7 | 0 | 3.810732  | -3.293920 | -0.465338 |
| 6 | 0 | 5.154845  | -3.340761 | -0.129711 |
| 6 | 0 | 5.528301  | -4.652067 | -0.204073 |
| 7 | 0 | 4.406910  | -5.379869 | -0.575500 |
| 6 | 0 | 3.384071  | -4.532418 | -0.730652 |
| 6 | 0 | 4.318724  | -6.830309 | -0.758043 |
| 8 | 0 | 1.284684  | 0.929757  | -0.931183 |
| 6 | 0 | 2.237139  | 1.985644  | -0.962994 |
| 6 | 0 | 2.202346  | 2.763020  | 0.362723  |
| 7 | 0 | 3.256739  | 3.791375  | 0.366544  |
| 6 | 0 | 4.511694  | 3.569074  | 0.772294  |
| 7 | 0 | 5.251537  | 4.644239  | 0.479934  |
| 6 | 0 | 4.436369  | 5.587071  | -0.129659 |
| 6 | 0 | 3.183490  | 5.050205  | -0.208949 |
| 6 | 0 | 6.685802  | 4.766210  | 0.750664  |
| 9 | 0 | 4.693476  | 0.630545  | 1.185499  |
| 5 | 0 | 5.791053  | 0.363612  | 0.308287  |
| 9 | 0 | 6.515066  | -0.738914 | 0.793708  |
| 9 | 0 | 6.608365  | 1.515204  | 0.258445  |
| 9 | 0 | 5.271491  | 0.072713  | -0.969931 |
| 9 | 0 | -1.109344 | -5.620537 | 0.321529  |
| 5 | 0 | 0.222769  | -5.212707 | 0.227745  |
| 9 | 0 | 0.372742  | -4.339720 | -0.909777 |
| 9 | 0 | 1.091681  | -6.311013 | 0.043207  |
| 9 | 0 | 0.598549  | -4.485010 | 1.377325  |
| 9 | 0 | 0.517250  | 5.918122  | -1.522721 |
| 5 | 0 | -0.469118 | 5.034518  | -1.058857 |
| 9 | 0 | -0.310467 | 4.859878  | 0.357701  |
| 9 | 0 | -1.759475 | 5.520516  | -1.310232 |
| 9 | 0 | -0.304506 | 3.760543  | -1.657534 |
| 1 | 0 | -0.370128 | 1.216430  | -0.664071 |
| 1 | 0 | -4.285052 | 1.071688  | -1.914837 |
| 1 | 0 | -3.802647 | 0.319457  | -0.394580 |
| 1 | 0 | -2.019531 | 0.277901  | -2.175171 |
| 1 | 0 | -1.930423 | 2.059131  | -2.120014 |
| 1 | 0 | -1.233897 | -0.410395 | 0.404377  |
| 1 | 0 | -2.793020 | -0.875120 | 1.840811  |
| 1 | 0 | -1.471374 | -1.559929 | 2.822535  |
| 1 | 0 | -1.682924 | -3.735169 | 1.619023  |
| 1 | 0 | -3.201747 | -3.276078 | 2.422637  |
| 1 | 0 | 0.692755  | -1.151703 | 1.102988  |
| 1 | 0 | 2.191904  | -2.727599 | 1.566415  |
| 1 | 0 | 3.463903  | -1.463803 | 1.617671  |
| 1 | 0 | 3.438419  | -1.275960 | -0.843898 |
| 1 | 0 | 2.016076  | -2.359697 | -0.935756 |
| 1 | 0 | 1.522374  | 0.297935  | -0.203655 |
| 1 | 0 | 1.954299  | 2.641908  | -1.789135 |
| 1 | 0 | 3.244585  | 1.584989  | -1.134224 |
| 1 | 0 | 2.398261  | 2.086341  | 1.198043  |
| 1 | 0 | 1.242426  | 3.259992  | 0.503358  |
| 1 | 0 | -5.261205 | -2.883717 | 0.965012  |
| 1 | 0 | -3.592933 | -3.300971 | -2.893516 |

|   |   |           |           |           |
|---|---|-----------|-----------|-----------|
| 1 | 0 | -1.541271 | -3.355422 | -1.004650 |
| 1 | 0 | 5.710189  | -2.448862 | 0.131894  |
| 1 | 0 | 6.481241  | -5.125598 | -0.025656 |
| 1 | 0 | 2.373280  | -4.799164 | -0.995750 |
| 1 | 0 | 4.865836  | 2.649314  | 1.212841  |
| 1 | 0 | 4.815798  | 6.544033  | -0.452746 |
| 1 | 0 | 2.260910  | 5.437868  | -0.622587 |
| 1 | 0 | -6.116780 | 2.126358  | -0.290173 |
| 1 | 0 | -5.986633 | 4.561870  | 1.049414  |
| 1 | 0 | -2.068813 | 3.304079  | 0.072595  |
| 1 | 0 | 3.266326  | -7.117611 | -0.723378 |
| 1 | 0 | 4.762515  | -7.115189 | -1.716013 |
| 1 | 0 | 4.852554  | -7.322133 | 0.058063  |
| 1 | 0 | 7.165292  | 5.246855  | -0.104705 |
| 1 | 0 | 6.848340  | 5.364989  | 1.651174  |
| 1 | 0 | 7.097712  | 3.763542  | 0.875594  |
| 1 | 0 | -2.250704 | 5.426908  | 1.381136  |
| 1 | 0 | -3.589545 | 6.352081  | 0.681567  |
| 1 | 0 | -3.765828 | 5.636677  | 2.320166  |
| 1 | 0 | -6.197294 | -2.149393 | -2.373125 |
| 1 | 0 | -6.344126 | -3.938874 | -2.270167 |
| 1 | 0 | -6.874655 | -2.882261 | -0.916381 |

# SI7 B3LYP/6-31+G\*-D3 optimized geometries of HEMim<sup>+</sup> clusters n=1-4

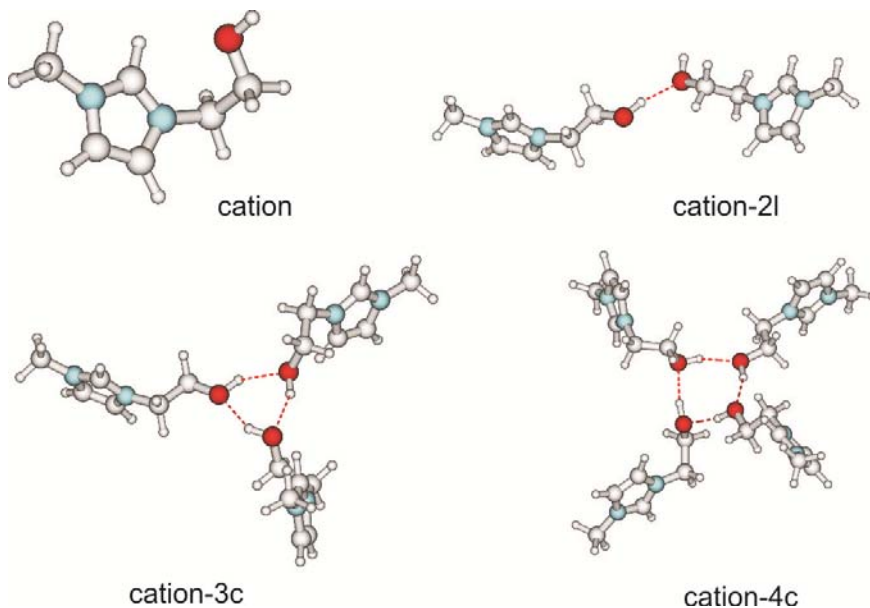

## Cation monomer

\*\*\* imOH\_BF4\_b3lyp\_6-31+Gp\_D3.g09

|   |          |          |          |
|---|----------|----------|----------|
| N | 4.527308 | 5.018642 | 4.717323 |
| C | 3.724581 | 3.934916 | 4.370811 |
| C | 2.502564 | 4.424990 | 4.118242 |
| N | 2.572824 | 5.807388 | 4.293706 |
| C | 3.807773 | 6.129964 | 4.647460 |
| C | 1.464429 | 6.764243 | 4.094263 |
| C | 5.945566 | 4.894271 | 5.161989 |
| C | 6.838381 | 5.988055 | 4.565875 |
| H | 5.950111 | 4.936052 | 6.242145 |
| H | 6.259730 | 3.919028 | 4.833379 |
| H | 0.793766 | 6.356808 | 3.353148 |
| H | 0.934955 | 6.908165 | 5.024722 |
| H | 1.887452 | 7.685969 | 3.737891 |
| H | 4.174162 | 7.119661 | 4.795428 |
| H | 1.607966 | 3.941551 | 3.812895 |
| H | 4.140721 | 2.963850 | 4.282409 |
| H | 7.830313 | 5.892439 | 4.991823 |
| O | 6.935496 | 5.820137 | 3.179379 |
| H | 6.471430 | 6.983322 | 4.767773 |
| H | 6.426707 | 5.065982 | 2.916335 |

## Cation dimer

\*\*\* imOH\_b3lyp\_6-31+Gp\_dimer\_D3.g09, E(RB3LYP) = -839.515427871, 5.8.2015

|   |   |           |           |           |
|---|---|-----------|-----------|-----------|
| 6 | 0 | -5.598022 | 0.304464  | -0.890386 |
| 7 | 0 | -4.694602 | 0.533524  | 0.073499  |
| 6 | 0 | -5.320507 | 0.389607  | 1.300154  |
| 6 | 0 | -6.623977 | 0.070291  | 1.052107  |
| 7 | 0 | -6.776344 | 0.021921  | -0.322188 |
| 6 | 0 | -3.272571 | 0.858803  | -0.136975 |
| 6 | 0 | -2.362684 | -0.349519 | 0.115163  |
| 8 | 0 | -1.052737 | 0.121085  | -0.123970 |

|   |   |           |           |           |
|---|---|-----------|-----------|-----------|
| 6 | 0 | -8.033660 | -0.266510 | -1.032218 |
| 8 | 0 | 1.260208  | -1.539015 | 0.165861  |
| 6 | 0 | 2.424710  | -0.850799 | -0.280790 |
| 6 | 0 | 3.528927  | -0.956291 | 0.788449  |
| 7 | 0 | 4.721662  | -0.172572 | 0.420415  |
| 6 | 0 | 4.837221  | 1.206236  | 0.494277  |
| 6 | 0 | 6.084570  | 1.529186  | 0.045108  |
| 7 | 0 | 6.713377  | 0.345597  | -0.298280 |
| 6 | 0 | 5.871797  | -0.667099 | -0.063905 |
| 6 | 0 | 8.087672  | 0.228030  | -0.817259 |
| 1 | 0 | 4.037874  | 1.828808  | 0.867177  |
| 1 | 0 | 6.087910  | -1.713076 | -0.225661 |
| 1 | 0 | 3.842344  | -1.994469 | 0.928179  |
| 1 | 0 | 3.159917  | -0.584214 | 1.747434  |
| 1 | 0 | 2.128270  | 0.193125  | -0.419313 |
| 1 | 0 | 2.778889  | -1.235268 | -1.246095 |
| 1 | 0 | 1.332187  | -2.490017 | -0.014897 |
| 1 | 0 | -0.396303 | -0.589035 | 0.017063  |
| 1 | 0 | -2.641140 | -1.169255 | -0.565995 |
| 1 | 0 | -2.491678 | -0.706308 | 1.149105  |
| 1 | 0 | -3.010259 | 1.679026  | 0.535778  |
| 1 | 0 | -3.152633 | 1.211646  | -1.163811 |
| 1 | 0 | -5.407550 | 0.350718  | -1.952554 |
| 1 | 0 | -4.793700 | 0.535106  | 2.231071  |
| 1 | 0 | -7.447656 | -0.117083 | 1.724833  |
| 1 | 0 | -8.768820 | 0.503918  | -0.790200 |
| 1 | 0 | -7.843622 | -0.266338 | -2.106168 |
| 1 | 0 | -8.401793 | -1.247771 | -0.726104 |
| 1 | 0 | 8.167533  | 0.789555  | -1.750216 |
| 1 | 0 | 8.785762  | 0.624486  | -0.077111 |
| 1 | 0 | 8.308982  | -0.823687 | -1.002495 |
| 1 | 0 | 6.576221  | 2.485880  | -0.051611 |

### Cation trimer

\*\*\* imOH\_b3lyp\_6-31+Gp\_trimer\_D3.g09, E(RB3LYP) = -1259.20900225, 5.8.2015

|   |   |           |           |           |
|---|---|-----------|-----------|-----------|
| 6 | 0 | -1.656817 | 4.575160  | 0.553046  |
| 7 | 0 | -1.801425 | 4.445635  | -0.776382 |
| 6 | 0 | -1.762286 | 5.709035  | -1.345742 |
| 6 | 0 | -1.590841 | 6.602709  | -0.329343 |
| 7 | 0 | -1.528394 | 5.874583  | 0.845508  |
| 6 | 0 | -1.999593 | 3.180212  | -1.508697 |
| 6 | 0 | -0.778186 | 2.269133  | -1.489650 |
| 8 | 0 | -0.649972 | 1.694853  | -0.179711 |
| 6 | 0 | -1.367897 | 6.450331  | 2.192363  |
| 8 | 0 | -1.411323 | -1.051968 | 0.239550  |
| 6 | 0 | -2.119886 | -1.395686 | 1.438172  |
| 6 | 0 | -2.301724 | -2.908903 | 1.495288  |
| 7 | 0 | -3.321860 | -3.419026 | 0.559620  |
| 6 | 0 | -4.393064 | -4.152069 | 0.907087  |
| 7 | 0 | -5.067236 | -4.483468 | -0.198265 |
| 6 | 0 | -4.408609 | -3.949351 | -1.291746 |
| 6 | 0 | -3.313691 | -3.284240 | -0.820117 |
| 6 | 0 | -6.299554 | -5.293020 | -0.252587 |
| 8 | 0 | 1.357499  | -0.340421 | 0.079737  |
| 6 | 0 | 2.541216  | -1.123446 | -0.067146 |
| 6 | 0 | 3.721721  | -0.145738 | -0.022021 |
| 7 | 0 | 5.010102  | -0.833609 | -0.208315 |
| 6 | 0 | 5.920581  | -1.075986 | 0.750449  |
| 7 | 0 | 6.963830  | -1.709209 | 0.205733  |
| 6 | 0 | 6.719993  | -1.880560 | -1.145415 |
| 6 | 0 | 5.498058  | -1.333025 | -1.406530 |

|   |   |           |           |           |
|---|---|-----------|-----------|-----------|
| 6 | 0 | 8.186481  | -2.138173 | 0.912344  |
| 1 | 0 | 0.244805  | 1.306883  | -0.087599 |
| 1 | 0 | -2.245612 | 3.447877  | -2.538673 |
| 1 | 0 | -2.864826 | 2.666463  | -1.079154 |
| 1 | 0 | -0.926573 | 1.482607  | -2.241655 |
| 1 | 0 | 0.122470  | 2.837119  | -1.753668 |
| 1 | 0 | -1.434331 | -0.077818 | 0.113725  |
| 1 | 0 | -3.096996 | -0.896495 | 1.468716  |
| 1 | 0 | -1.546609 | -1.092752 | 2.324781  |
| 1 | 0 | -1.355951 | -3.411902 | 1.270701  |
| 1 | 0 | -2.611730 | -3.201884 | 2.501491  |
| 1 | 0 | 0.568542  | -0.918395 | 0.149346  |
| 1 | 0 | 2.535844  | -1.666930 | -1.022200 |
| 1 | 0 | 2.634111  | -1.854010 | 0.748062  |
| 1 | 0 | 3.749356  | 0.372267  | 0.939580  |
| 1 | 0 | 3.625701  | 0.605595  | -0.810833 |
| 1 | 0 | -4.662155 | -4.437050 | 1.914047  |
| 1 | 0 | -4.771506 | -4.091832 | -2.299014 |
| 1 | 0 | -2.541281 | -2.725857 | -1.323974 |
| 1 | 0 | 5.830313  | -0.794304 | 1.789462  |
| 1 | 0 | 7.432580  | -2.364119 | -1.797663 |
| 1 | 0 | 4.949002  | -1.245764 | -2.331906 |
| 1 | 0 | -1.870641 | 5.864418  | -2.408926 |
| 1 | 0 | -1.517438 | 7.680374  | -0.339872 |
| 1 | 0 | -1.637299 | 3.758868  | 1.258213  |
| 1 | 0 | 8.301286  | -3.218433 | 0.803762  |
| 1 | 0 | 9.047205  | -1.621901 | 0.482321  |
| 1 | 0 | 8.095168  | -1.882582 | 1.968565  |
| 1 | 0 | -1.364552 | 5.643445  | 2.926011  |
| 1 | 0 | -0.423767 | 6.996779  | 2.240355  |
| 1 | 0 | -2.202130 | 7.125281  | 2.394836  |
| 1 | 0 | -7.094482 | -4.705174 | -0.715704 |
| 1 | 0 | -6.108659 | -6.196129 | -0.835826 |
| 1 | 0 | -6.590003 | -5.566991 | 0.762258  |

### Cation tetramer

\*\*\* imOH\_b3lyp\_6-31+Gp\_tetramer\_D3.g09, E(RB3LYP) = -1678.85144940, 5.8.2015

|   |   |           |           |           |
|---|---|-----------|-----------|-----------|
| 6 | 0 | 2.388994  | 4.864478  | -1.506478 |
| 7 | 0 | 1.997684  | 4.033072  | -2.486465 |
| 6 | 0 | 2.930224  | 4.100274  | -3.511414 |
| 6 | 0 | 3.889381  | 4.989794  | -3.124718 |
| 7 | 0 | 3.531956  | 5.455263  | -1.871483 |
| 6 | 0 | 0.761294  | 3.229561  | -2.514822 |
| 6 | 0 | 0.930899  | 1.789058  | -2.034479 |
| 8 | 0 | 0.949733  | 1.756997  | -0.600041 |
| 6 | 0 | 4.270676  | 6.475622  | -1.102605 |
| 8 | 0 | -1.606862 | 1.287079  | 0.569826  |
| 6 | 0 | -1.628196 | 1.669850  | 1.954393  |
| 6 | 0 | -3.044603 | 1.534104  | 2.506888  |
| 7 | 0 | -3.960454 | 2.614373  | 2.095273  |
| 6 | 0 | -4.681053 | 3.378927  | 2.935261  |
| 7 | 0 | -5.450318 | 4.202977  | 2.218430  |
| 6 | 0 | -5.221608 | 3.961461  | 0.875361  |
| 6 | 0 | -4.291358 | 2.965151  | 0.795147  |
| 6 | 0 | -6.398804 | 5.197454  | 2.761268  |
| 8 | 0 | -1.187919 | -1.432579 | -0.166158 |
| 6 | 0 | -2.310252 | -2.309383 | -0.286802 |
| 6 | 0 | -1.832325 | -3.556368 | -1.042863 |
| 7 | 0 | -2.893955 | -4.568254 | -1.172023 |
| 6 | 0 | -3.381871 | -5.370858 | -0.150348 |
| 6 | 0 | -4.328738 | -6.186464 | -0.697459 |



|   |   |           |           |           |
|---|---|-----------|-----------|-----------|
| 7 | 0 | -4.407711 | -5.875790 | -2.043354 |
| 6 | 0 | -3.534872 | -4.899851 | -2.307980 |
| 6 | 0 | -5.294417 | -6.540649 | -3.020815 |
| 8 | 0 | 1.606970  | -0.906215 | 0.218241  |
| 6 | 0 | 2.543077  | -1.940110 | 0.534037  |
| 6 | 0 | 3.851836  | -1.254929 | 0.947927  |
| 7 | 0 | 4.919796  | -2.229001 | 1.227901  |
| 6 | 0 | 5.414392  | -2.533427 | 2.441947  |
| 7 | 0 | 6.387906  | -3.436814 | 2.298445  |
| 6 | 0 | 6.528877  | -3.724862 | 0.952544  |
| 6 | 0 | 5.612403  | -2.970047 | 0.280690  |
| 6 | 0 | 7.203209  | -4.019632 | 3.384375  |
| 1 | 0 | 1.364448  | 0.916064  | -0.306020 |
| 1 | 0 | 0.408406  | 3.235070  | -3.549664 |
| 1 | 0 | 0.012309  | 3.743482  | -1.906333 |
| 1 | 0 | 0.081961  | 1.204774  | -2.415174 |
| 1 | 0 | 1.852423  | 1.356486  | -2.442883 |
| 1 | 0 | -0.745184 | 1.565652  | 0.175745  |
| 1 | 0 | -1.271911 | 2.700536  | 2.074256  |
| 1 | 0 | -0.976318 | 1.008246  | 2.540606  |
| 1 | 0 | -3.482283 | 0.581102  | 2.192553  |
| 1 | 0 | -3.008549 | 1.544262  | 3.599209  |
| 1 | 0 | -1.486348 | -0.539964 | 0.125896  |
| 1 | 0 | -3.122734 | -1.826743 | -0.846033 |
| 1 | 0 | -2.691294 | -2.593022 | 0.704287  |
| 1 | 0 | -0.991134 | -4.019145 | -0.518394 |
| 1 | 0 | -1.498561 | -3.285499 | -2.047313 |
| 1 | 0 | 0.714211  | -1.294042 | 0.087693  |
| 1 | 0 | 2.715551  | -2.586330 | -0.337642 |
| 1 | 0 | 2.172959  | -2.561244 | 1.360564  |
| 1 | 0 | 3.698188  | -0.652406 | 1.846360  |
| 1 | 0 | 4.202514  | -0.593057 | 0.150684  |
| 1 | 0 | -4.651859 | 3.330135  | 4.014565  |
| 1 | 0 | -5.740395 | 4.510985  | 0.103382  |
| 1 | 0 | -3.832866 | 2.478611  | -0.050746 |
| 1 | 0 | -3.010436 | -5.305893 | 0.861100  |
| 1 | 0 | -4.940077 | -6.958528 | -0.252673 |
| 1 | 0 | -3.362459 | -4.460181 | -3.279662 |
| 1 | 0 | 5.088463  | -2.107328 | 3.379701  |
| 1 | 0 | 7.266675  | -4.427723 | 0.592968  |
| 1 | 0 | 5.408147  | -2.889109 | -0.776219 |
| 1 | 0 | 2.820796  | 3.537587  | -4.426789 |
| 1 | 0 | 4.774516  | 5.341975  | -3.634718 |
| 1 | 0 | 1.860694  | 5.035577  | -0.580937 |
| 1 | 0 | -5.159481 | -6.075053 | -3.997631 |
| 1 | 0 | -5.031749 | -7.599002 | -3.077602 |
| 1 | 0 | -6.330773 | -6.425715 | -2.697493 |
| 1 | 0 | 7.082534  | -5.104642 | 3.377786  |
| 1 | 0 | 8.250436  | -3.755239 | 3.224163  |
| 1 | 0 | 6.864052  | -3.616803 | 4.339286  |
| 1 | 0 | 3.782151  | 6.617600  | -0.138014 |
| 1 | 0 | 5.296860  | 6.136030  | -0.950010 |
| 1 | 0 | 4.265470  | 7.415418  | -1.658970 |
| 1 | 0 | -6.114288 | 6.191619  | 2.411314  |
| 1 | 0 | -7.406825 | 4.950874  | 2.421775  |
| 1 | 0 | -6.360952 | 5.166618  | 3.850684  |

## SI8 B3LYP/6-31+G\*-D3 optimized geometries of propanol clusters n=1-4

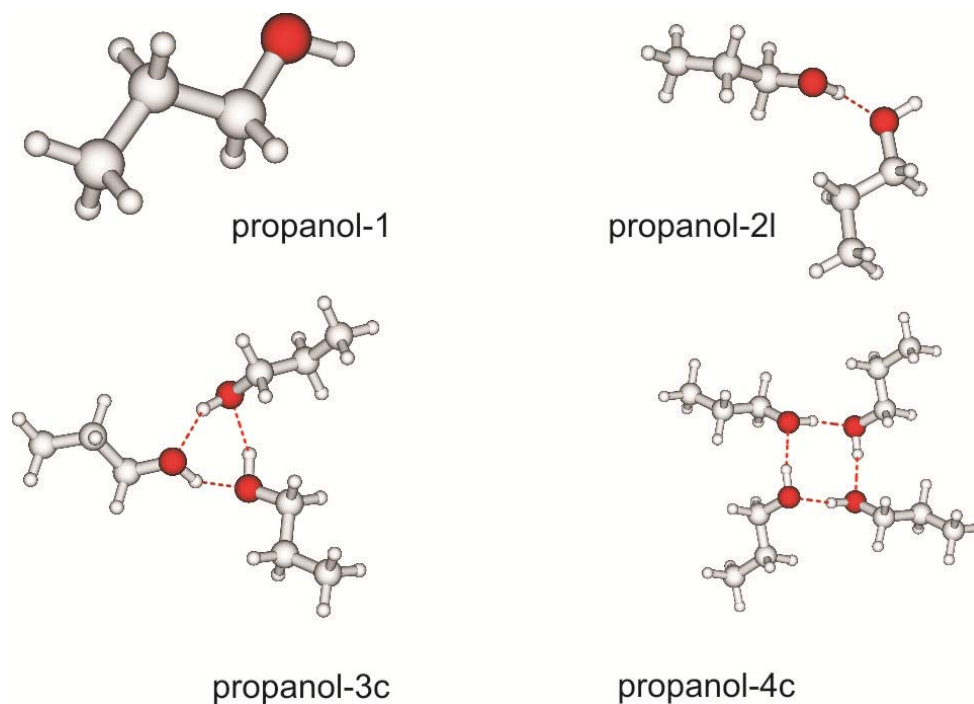

### Propanol Monomer

\*\*\* propanol\_1, B3LYP 6-31+G\* opt, E(RB3LYP) = -194.365963872, 15.09.2015

|   |   |   |           |           |           |
|---|---|---|-----------|-----------|-----------|
| 0 | 1 |   |           |           |           |
|   | 6 | 0 | -0.523007 | -0.527116 | -0.000073 |
|   | 6 | 0 | 0.613310  | 0.486049  | 0.000073  |
|   | 8 | 0 | 1.850182  | -0.234972 | 0.000015  |
|   | 1 | 0 | 2.586962  | 0.394498  | 0.000132  |
|   | 6 | 0 | -1.901364 | 0.143924  | -0.000032 |
|   | 1 | 0 | -0.412648 | -1.172868 | 0.880646  |
|   | 1 | 0 | -0.412602 | -1.172666 | -0.880934 |
|   | 1 | 0 | 0.540928  | 1.131812  | -0.890596 |
|   | 1 | 0 | 0.540888  | 1.131601  | 0.890891  |
|   | 1 | 0 | -2.038104 | 0.777217  | -0.886220 |
|   | 1 | 0 | -2.038145 | 0.777026  | 0.886286  |
|   | 1 | 0 | -2.702374 | -0.603987 | -0.000131 |

### Propanol Dimer

\*\*\* propanol\_2, B3LYP 6-31+G\* opt, E(RB3LYP) = -388.745266754, 15.09.2015

|   |   |   |           |           |           |
|---|---|---|-----------|-----------|-----------|
| 0 | 1 |   |           |           |           |
|   | 6 | 0 | -2.065920 | 0.736552  | -0.262501 |
|   | 6 | 0 | -2.587834 | -0.664204 | 0.024373  |
|   | 8 | 0 | -1.620781 | -1.612934 | -0.469220 |
|   | 1 | 0 | -1.933426 | -2.514316 | -0.296789 |
|   | 6 | 0 | -3.044776 | 1.819577  | 0.205837  |
|   | 1 | 0 | -1.884590 | 0.826212  | -1.341447 |
|   | 1 | 0 | -1.098310 | 0.857262  | 0.239380  |
|   | 1 | 0 | -2.731441 | -0.802910 | 1.106191  |

|   |   |           |           |           |
|---|---|-----------|-----------|-----------|
| 1 | 0 | -3.553301 | -0.825630 | -0.477612 |
| 1 | 0 | -3.220908 | 1.756767  | 1.287206  |
| 1 | 0 | -4.015659 | 1.728823  | -0.298144 |
| 1 | 0 | -2.651323 | 2.819439  | -0.008024 |
| 1 | 0 | 0.046801  | -1.274123 | 0.318186  |
| 8 | 0 | 0.856542  | -0.956962 | 0.764923  |
| 6 | 0 | 1.719628  | -0.380207 | -0.209079 |
| 6 | 0 | 2.937795  | 0.199560  | 0.499304  |
| 1 | 0 | 1.200112  | 0.417805  | -0.767899 |
| 1 | 0 | 2.040994  | -1.137414 | -0.944833 |
| 1 | 0 | 3.425889  | -0.604881 | 1.064998  |
| 1 | 0 | 2.591951  | 0.936531  | 1.236269  |
| 6 | 0 | 3.930105  | 0.844990  | -0.474608 |
| 1 | 0 | 3.462481  | 1.664981  | -1.035478 |
| 1 | 0 | 4.305055  | 0.115494  | -1.204415 |
| 1 | 0 | 4.795603  | 1.257513  | 0.056831  |

### Propanol Trimer

% \*\*\* propanol\_3, B3LYP 6-31+G\* opt, E(RB3LYP) = -583.134480305, 15.09.2015

0 1

|   |   |           |           |           |
|---|---|-----------|-----------|-----------|
| 6 | 0 | 1.661484  | -2.993956 | -0.014440 |
| 6 | 0 | 1.803387  | -1.524433 | -0.387241 |
| 8 | 0 | 0.623845  | -1.109977 | -1.082614 |
| 1 | 0 | 0.645447  | -0.131584 | -1.193883 |
| 6 | 0 | 2.900503  | -3.533601 | 0.708798  |
| 1 | 0 | 1.473837  | -3.567356 | -0.931505 |
| 1 | 0 | 0.772033  | -3.109897 | 0.619568  |
| 1 | 0 | 1.944660  | -0.915953 | 0.521110  |
| 1 | 0 | 2.687166  | -1.379072 | -1.028149 |
| 1 | 0 | 3.090909  | -2.983639 | 1.639576  |
| 1 | 0 | 3.796871  | -3.447354 | 0.081239  |
| 1 | 0 | 2.776527  | -4.591188 | 0.967545  |
| 1 | 0 | -0.896042 | -0.901974 | -0.042739 |
| 8 | 0 | -1.559473 | -0.335507 | 0.414616  |
| 6 | 0 | -2.870204 | -0.625692 | -0.082423 |
| 6 | 0 | -3.846643 | 0.387188  | 0.500517  |
| 1 | 0 | -3.163332 | -1.646316 | 0.208939  |
| 1 | 0 | -2.880462 | -0.574249 | -1.182639 |
| 1 | 0 | -3.522230 | 1.394921  | 0.207285  |
| 1 | 0 | -3.783541 | 0.340493  | 1.595570  |
| 6 | 0 | -5.287041 | 0.140572  | 0.037743  |
| 1 | 0 | -5.638315 | -0.854075 | 0.341253  |
| 1 | 0 | -5.371412 | 0.204735  | -1.054734 |
| 1 | 0 | -5.971529 | 0.880320  | 0.468049  |
| 1 | 0 | -0.673884 | 1.161763  | -0.216550 |
| 8 | 0 | 0.088691  | 1.578473  | -0.680094 |
| 6 | 0 | 0.936100  | 2.208041  | 0.285559  |
| 6 | 0 | 2.263291  | 2.552405  | -0.377735 |
| 1 | 0 | 1.102991  | 1.535336  | 1.142235  |
| 1 | 0 | 0.455395  | 3.121749  | 0.668418  |
| 1 | 0 | 2.060626  | 3.180833  | -1.254565 |
| 1 | 0 | 2.720002  | 1.626118  | -0.753102 |
| 6 | 0 | 3.226191  | 3.263930  | 0.579305  |
| 1 | 0 | 3.457771  | 2.638167  | 1.451029  |
| 1 | 0 | 2.797176  | 4.203987  | 0.949082  |
| 1 | 0 | 4.172430  | 3.503583  | 0.081209  |

### Propanol Tetramer

\*\*\* propanol\_4, B3LYP 6-31+G\* opt, E(RB3LYP) = -777.527236311, 25.09.2015

0 1

|   |   |           |           |           |
|---|---|-----------|-----------|-----------|
| 6 | 0 | -2.308927 | -3.174669 | 0.174170  |
| 6 | 0 | -2.424392 | -1.658628 | 0.269355  |
| 8 | 0 | -1.256381 | -1.143945 | 0.915308  |
| 1 | 0 | -1.271817 | -0.153355 | 0.872294  |
| 6 | 0 | -3.537396 | -3.809944 | -0.486840 |
| 1 | 0 | -2.168814 | -3.575702 | 1.186519  |
| 1 | 0 | -1.402980 | -3.422177 | -0.395097 |
| 1 | 0 | -2.525463 | -1.223034 | -0.737916 |
| 1 | 0 | -3.320823 | -1.382279 | 0.846091  |
| 1 | 0 | -3.679401 | -3.432919 | -1.507845 |
| 1 | 0 | -4.452055 | -3.592423 | 0.079680  |
| 1 | 0 | -3.434309 | -4.899314 | -0.546302 |
| 1 | 0 | 0.205498  | -1.494517 | 0.053964  |
| 8 | 0 | 1.048265  | -1.537950 | -0.468026 |
| 6 | 0 | 2.061281  | -2.165546 | 0.322469  |
| 6 | 0 | 3.363288  | -2.184072 | -0.468166 |
| 1 | 0 | 1.755255  | -3.193072 | 0.572288  |
| 1 | 0 | 2.198569  | -1.619955 | 1.270096  |
| 1 | 0 | 3.637255  | -1.150747 | -0.720706 |
| 1 | 0 | 3.185107  | -2.703226 | -1.418733 |
| 6 | 0 | 4.504100  | -2.856269 | 0.303803  |
| 1 | 0 | 4.260963  | -3.899053 | 0.544860  |
| 1 | 0 | 4.707955  | -2.335280 | 1.248276  |
| 1 | 0 | 5.430283  | -2.857627 | -0.282001 |
| 1 | 0 | 1.271726  | 0.153443  | -0.872440 |
| 8 | 0 | 1.256501  | 1.144056  | -0.915488 |
| 6 | 0 | 2.424311  | 1.658535  | -0.269011 |
| 6 | 0 | 2.308999  | 3.174583  | -0.173735 |
| 1 | 0 | 3.320946  | 1.382133  | -0.845405 |
| 1 | 0 | 2.524924  | 1.222840  | 0.738263  |
| 1 | 0 | 1.402854  | 3.422150  | 0.395190  |
| 1 | 0 | 2.169343  | 3.575722  | -1.186105 |
| 6 | 0 | 3.537282  | 3.809646  | 0.487825  |
| 1 | 0 | 4.452143  | 3.592050  | -0.078340 |
| 1 | 0 | 3.678821  | 3.432520  | 1.508857  |
| 1 | 0 | 3.434314  | 4.899025  | 0.547332  |
| 1 | 0 | -0.205487 | 1.494593  | -0.054289 |
| 8 | 0 | -1.048268 | 1.538075  | 0.467685  |
| 6 | 0 | -2.061266 | 2.165590  | -0.322878 |
| 6 | 0 | -3.363275 | 2.184223  | 0.467758  |
| 1 | 0 | -2.198580 | 1.619879  | -1.270435 |
| 1 | 0 | -1.755235 | 3.193081  | -0.572841 |
| 1 | 0 | -3.185081 | 2.703470  | 1.418272  |
| 1 | 0 | -3.637255 | 1.150923  | 0.720403  |
| 6 | 0 | -4.504081 | 2.856353  | -0.304276 |
| 1 | 0 | -4.707919 | 2.335290  | -1.248713 |
| 1 | 0 | -4.260946 | 3.899119  | -0.545409 |
| 1 | 0 | -5.430273 | 2.857749  | 0.281515  |

## SI9 DFT-D3 calculated frequencies of the [HEMIm][BF<sub>4</sub>] clusters ca and cc

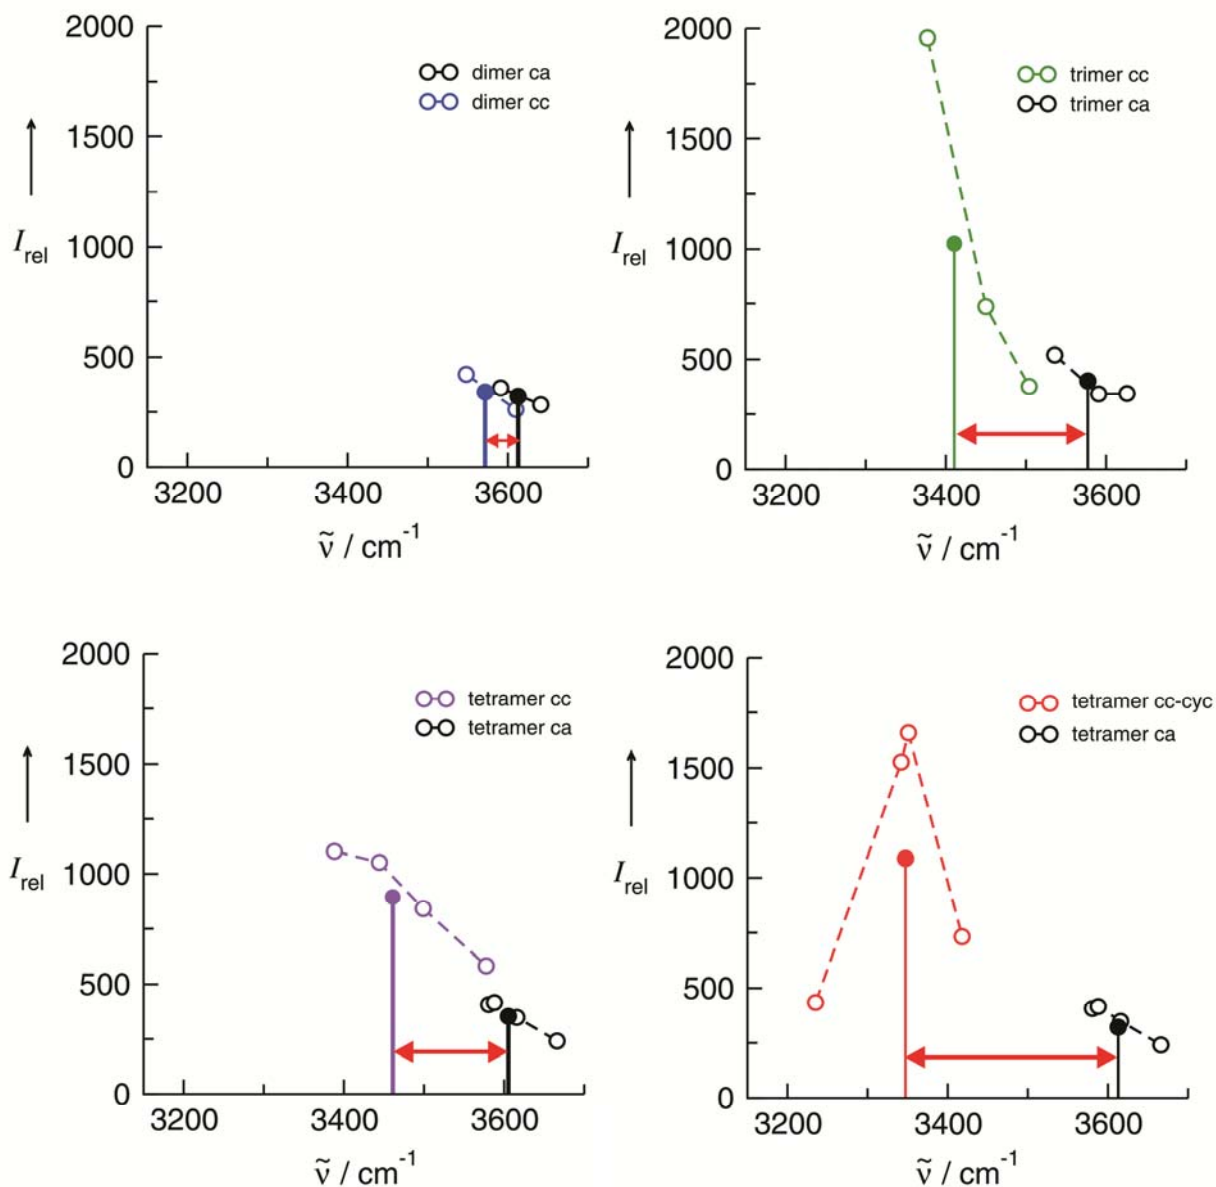

**SI-FIG3** DFT-D3 calculated frequencies and intensities of the OH stretches in the dimer cc (blue), the trimer cc (green), the tetramer cc (purple) and the tetramer cc-cyc (red) compared to the corresponding values of the ca clusters  $n=2-4$  (black). The average values for each cluster ca and cc are given by the filled symbols.

**SI10 B3LYP/6-31+G\*-D3 calculated total energies and binding energies of [PMIm][BF<sub>4</sub>] and [HEMIm][BF<sub>4</sub>] clusters n=1-6.**

*SI Table 1.* Total energies (in Hartrees) and binding energies (in kJmol<sup>-1</sup>) for [PMIm][BF<sub>4</sub>] and [HEMIm][BF<sub>4</sub>] clusters.

|                                |          | total energy/<br>Hartree | binding energy/<br>kJmol <sup>-1</sup> |
|--------------------------------|----------|--------------------------|----------------------------------------|
| <b>[PMIm][BF<sub>4</sub>]</b>  | <b>1</b> | -808.592825              | -364.3506                              |
|                                | <b>2</b> | -1617.236463             | -431.0562                              |
|                                | <b>3</b> | -2425.857908             | -433.8685                              |
|                                | <b>4</b> | -3234.493186             | -444.3543                              |
|                                | <b>5</b> | -4043.139364             | -456.3695                              |
|                                | <b>6</b> | -4851.765687             | -455.6913                              |
| <b>[HEMIm][BF<sub>4</sub>]</b> | <b>1</b> | -844.496692              | -375.9992                              |
|                                | <b>2</b> | -1689.040276             | -437.5556                              |
|                                | <b>3</b> | -2533.584188             | -458.3619                              |
|                                | <b>4</b> | -3378.115756             | -460.6627                              |
|                                | <b>5</b> | -4222.669943             | -473.9204                              |
|                                | <b>6</b> | -5067.193783             | -469.4790                              |

**SI11 B3LYP/6-31+G\*-D3 calculated geometries and frequencies of [HEMIm][BF<sub>4</sub>], [HEMIm]<sup>+</sup> and propanol clusters n=1-4.**

*SI Table 2.* Intramolecular bond lengths, r<sub>OH</sub>, and intermolecular bond lengths, r<sub>OH...O</sub> and r<sub>O...O</sub>, and average, intensity weighted OH vibrational frequencies, ν<sub>OH</sub>, in [HEMIm][BF<sub>4</sub>] clusters, cationic [HEMIm]<sup>+</sup> clusters and propanol clusters.

|                                |           | rOH/Å  | rOH...O/Å | rO...O/Å | ν <sub>OH</sub> /cm <sup>-1</sup> |
|--------------------------------|-----------|--------|-----------|----------|-----------------------------------|
| <b>[HEMIm][BF<sub>4</sub>]</b> | <b>2</b>  | 0.9805 | 1.9184    | 2.8715   | 3571.6                            |
|                                | <b>3l</b> | 0.9880 | 1.7374    | 2.7130   | 3410.5                            |
|                                | <b>4l</b> | 0.9863 | 1.7747    | 2.7536   | 3461.0                            |
|                                | <b>4c</b> | 0.9923 | 1.7194    | 2.6900   | 3347.3                            |
| <b>[HEMIm]<sup>+</sup></b>     | <b>1</b>  | 0.9701 | -         | -        | 3765.8                            |
|                                | <b>2</b>  | 0.9740 | 1.9154    | 2.8618   | 3638.9                            |
|                                | <b>3c</b> | 0.9809 | 1.9806    | 2.8716   | 3638.0                            |
|                                | <b>4c</b> | 0.9836 | 1.8984    | 2.8579   | 3506.5                            |
| <b>propanol</b>                | <b>1</b>  | 0.9701 | -         | -        | 3765.8                            |
|                                | <b>2</b>  | 0.9736 | 1.8750    | 2.8444   | 3615.2                            |
|                                | <b>3c</b> | 0.9849 | 1.8581    | 2.7606   | 3504.0                            |
|                                | <b>4c</b> | 0.9920 | 1.7439    | 2.7219   | 3360.0                            |

**SI12 Mid infrared spectra of [HEMim][BF<sub>4</sub>] at 213 K, 0.5 mol% ethanol and propanol in CCl<sub>4</sub> at 283 K**

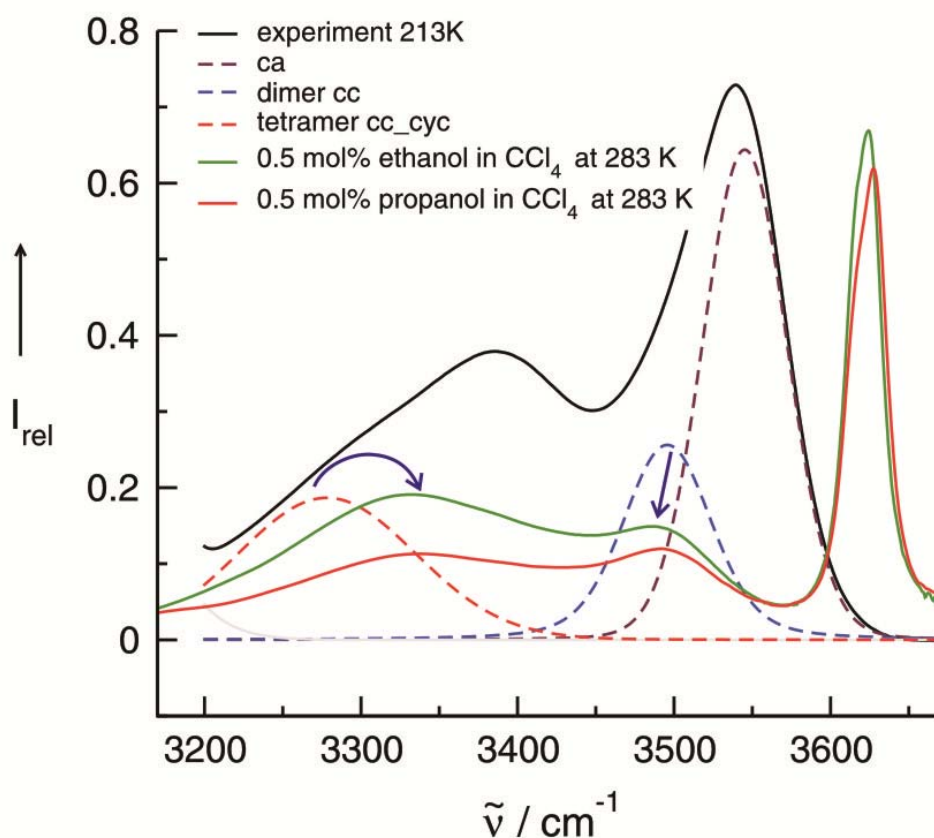

**SI-FIG4** Although the mid infrared spectra of pure [HEMim][BF<sub>4</sub>] at 213 K, 0.5 mol% ethanol and propanol in CCl<sub>4</sub> at 283 K show different systems at different concentrations and temperatures, it is shown that the deconvoluted bands of the H-bonded dimers and cyclic tetramers in the IL (dotted lines) and the alcohols indicate comparable red shifts.
